# Supplementary material for: Plain packaging of waterpipe tobacco? A qualitative analysis exploring waterpipe smokers’ and non-smokers’ responses to enhanced versus existing pictorial health warnings in Egypt
Source: PubMed Central journal article supplement (PMC6224725; doi:10.1136/bmjopen-2018-023496), 2018-10-23
Supplement: bmjopen-2018-023496.draft_revisions.pdf [file bmjopen-2018-023496.draft_revisions.pdf]

# BMJ Open

BMJ Open is committed to open peer review. As part of this commitment we make the peer review history of every article we publish publicly available.

When an article is published we post the peer reviewers' comments and the authors' responses online. We also post the versions of the paper that were used during peer review. These are the versions that the peer review comments apply to.

The versions of the paper that follow are the versions that were submitted during the peer review process. They are not the versions of record or the final published versions. They should not be cited or distributed as the published version of this manuscript.

BMJ Open is an open access journal and the full, final, typeset and author-corrected version of record of the manuscript is available on our site with no access controls, subscription charges or pay-per-view fees (<http://bmjopen.bmj.com>).

If you have any questions on BMJ Open's open peer review process please email [info.bmjopen@bmj.com](mailto:info.bmjopen@bmj.com)

# BMJ Open

## Plain Packaging of Waterpipe Tobacco? A Qualitative Analysis Exploring Waterpipe Smokers' and Non-smokers' Responses to Enhanced versus Existing Pictorial Health Warnings in Egypt

|                               |                                                                                                                                                                                                                                                                                                                                                                                                                                                                                                                                                                                                                                                                                                                                                                                                                                                                  |
|-------------------------------|------------------------------------------------------------------------------------------------------------------------------------------------------------------------------------------------------------------------------------------------------------------------------------------------------------------------------------------------------------------------------------------------------------------------------------------------------------------------------------------------------------------------------------------------------------------------------------------------------------------------------------------------------------------------------------------------------------------------------------------------------------------------------------------------------------------------------------------------------------------|
| Journal:                      | <i>BMJ Open</i>                                                                                                                                                                                                                                                                                                                                                                                                                                                                                                                                                                                                                                                                                                                                                                                                                                                  |
| Manuscript ID                 | bmjopen-2018-023496                                                                                                                                                                                                                                                                                                                                                                                                                                                                                                                                                                                                                                                                                                                                                                                                                                              |
| Article Type:                 | Research                                                                                                                                                                                                                                                                                                                                                                                                                                                                                                                                                                                                                                                                                                                                                                                                                                                         |
| Date Submitted by the Author: | 09-Apr-2018                                                                                                                                                                                                                                                                                                                                                                                                                                                                                                                                                                                                                                                                                                                                                                                                                                                      |
| Complete List of Authors:     | Mostafa, Aya; Faculty of Medicine, Ain Shams University, Department of Community, Environmental, and Occupational Medicine<br>Mohammed, Heba Tallah; Faculty of Medicine, Ain Shams University, Department of Community, Environmental, and Occupational Medicine;<br>University of Waterloo, Ontario, School of Pharmacy<br>Mohamed, Wafaa; Faculty of Medicine, Ain Shams University, Department of Community, Environmental, and Occupational Medicine<br>Elhabiby, Mahmoud; Faculty of Medicine, Ain Shams University, Department of Psychiatry Medicine<br>Safwat, Wael; Egyptian Tobacco Control Coalition<br>Labib, Sahar; Tobacco Control Unit, Ministry of Health<br>Abou-El-Fetouh, Aisha; Faculty of Medicine, Ain Shams University, Department of Community, Environmental, and Occupational Medicine<br>Hoek, Janet; University of Otago, Marketing |
| Keywords:                     | Plain packaging, Health warnings, Waterpipe tobacco, Uptake, Cessation, QUALITATIVE RESEARCH                                                                                                                                                                                                                                                                                                                                                                                                                                                                                                                                                                                                                                                                                                                                                                     |
|                               |                                                                                                                                                                                                                                                                                                                                                                                                                                                                                                                                                                                                                                                                                                                                                                                                                                                                  |

SCHOLARONE™  
Manuscripts

**RESEARCH ARTICLE****Plain Packaging of Waterpipe Tobacco? A Qualitative Analysis Exploring Waterpipe Smokers' and Non-smokers' Responses to Enhanced versus Existing Pictorial Health Warnings in Egypt**

Aya Mostafa<sup>1</sup>, Heba Tallah Mohammed<sup>1,2</sup>, Wafaa Mohamed<sup>1</sup>, Mahmoud Elhabiby<sup>3</sup>, Wael Safwat<sup>4</sup>, Sahar Labib<sup>5</sup>, Aisha Aboufotouh<sup>1</sup>, Janet Hoek<sup>6</sup>

<sup>1</sup> Department of Community, Environmental, and Occupational Medicine, Faculty of Medicine, Ain Shams University, Cairo, Egypt

<sup>2</sup> School of Pharmacy, University of Waterloo, Ontario, Canada

<sup>3</sup> Department of Psychiatry Medicine, Faculty of Medicine, Ain Shams University, Cairo, Egypt

<sup>4</sup> Egyptian Tobacco Control Coalition, Cairo, Egypt

<sup>5</sup> Tobacco Control Unit, Ministry of Health, Cairo, Egypt

<sup>6</sup> Departments of Public Health and Marketing, University of Otago, New Zealand

**CORRESPONDING AUTHOR**

Dr. Aya Mostafa (ORCID: <http://orcid.org/0000-0002-2803-2608>; Scopus ID: 36010130700)

Department of Community, Environmental, and Occupational Medicine, Faculty of Medicine,

Ain Shams University, Abbasia Square, Cairo, Egypt, PO-box 11566 Cairo, Egypt

E-mail: [aya.kamaleldin@med.asu.edu.eg](mailto:aya.kamaleldin@med.asu.edu.eg) Phone: +2 0100 5217379

**WORD COUNT** Abstract 291, Main text 4,092 (Introduction 720, Methods 1101, Results 1402, Discussion 870).

This manuscript has not been published in another journal, nor is it under review elsewhere.

**ABBREVIATIONS**

**FCTC** — Framework Convention on Tobacco Control

**PHWs** — Pictorial Health Warnings

**WHO** — World Health Organization

**WT** — Waterpipe Tobacco

**WTS** — Waterpipe Tobacco Smoking

**WTPs** — Waterpipe Tobacco Packs

## ABSTRACT

**Objectives** Despite the global increase in waterpipe tobacco smoking (WTS), few studies have assessed the effectiveness of waterpipe tobacco (WT) health warnings. Although Egypt has used four generic pictorial health warnings (PHWs) on waterpipe tobacco packs (WTPs) and has rotated these every two years since 2008, WTS rates have continued to rise. We explored in this qualitative study how participants perceived existing PHWs on WTPs, assessed how they interpreted novel plain packaging of WT featuring enhanced PHWs, and probed perceptions of how existing and novel sets would affect uptake or cessation of WTS.

**Design** We conducted ten qualitative focus groups and ten in-depth interviews. We explored participants' views of the four existing PHWs (occupied 50% of the front and back of WTPs, displayed cancers, and featured colourful fruits and flavors) and four novel PHWs (occupied 80% of the front and back of WTPs, displayed different topical content, with plain packaging). Transcripts were analyzed using thematic analysis.

**Setting** Rural Menoufia, urban and semi-urban Cairo, Egypt.

**Participants** 90 waterpipe smokers and non-smokers, males and females, aged 18 years or older.

**Outcomes** Perceived potential effect on WTS uptake or cessation, probing factors related to PHW content and WTP design.

**Results** Participants in focus groups and in-depth interviews thought existing WT PHWs elicited affective responses, but found them unclear or unrealistic and thought the colourful packaging detracted from the warnings. In contrast, they thought novel and larger WT PHWs presented in plain packaging might prevent WTS initiation or trigger quit attempts. Participants regarded warnings featuring proximal health risks as most likely to be acceptable.

**Conclusions** Our exploratory study suggests larger WT PHWs featuring proximal risks and

1  
2  
3 presented on plain WTPs could potentially deter experimentation with WT products among non-  
4  
5 users and promote cessation among existing users.  
6  
7

8  
9 The abstract of this study has been presented at the World Conference on Tobacco and Health,  
10  
11 2018 in South Africa: <https://doi.org/10.18332/tid/84640>.  
12  
13  
14  
15  
16  
17  
18  
19  
20  
21  
22  
23  
24  
25  
26  
27  
28  
29  
30  
31  
32  
33  
34  
35  
36  
37  
38  
39  
40  
41  
42  
43  
44  
45  
46  
47  
48  
49  
50  
51  
52  
53  
54  
55  
56  
57  
58  
59  
60

For peer review only

## ARTICLE SUMMARY

### Strengths and limitations of this study

- This is the first qualitative study to explore plain packaging of waterpipe tobacco products in a country that has existing waterpipe tobacco pictorial health warnings.
- We provide novel insights from both non-smokers and smokers into potential policy-relevant outcomes, particularly uptake and cessation of waterpipe tobacco smoking.
- Use of combined focus groups and in-depth interviews as qualitative methods offered rich understanding of perceptions related to waterpipe tobacco labelling, with respect to which contents pictorial health warnings might feature, and how design of waterpipe tobacco packs might be improved.
- Our sample of 90 individuals means we cannot generalize our findings, however we included a variety of participants, and achieved data saturation.
- While we explored projected rather than actual responses to existing and novel waterpipe tobacco pictorial health warnings with plain packaging, our findings could guide future experimental studies and assist policy-makers to improve waterpipe tobacco regulations.

### KEY WORDS

Plain packaging, Health warnings, Waterpipe tobacco, Uptake, Cessation, Qualitative research

## INTRODUCTION

The introduction of flavoured tobacco and the lack of regulatory policies have seen waterpipe tobacco smoking (WTS) increase globally.<sup>1</sup> Misperceptions that WTS is a safe alternative to cigarette smoking may also have contributed to rising waterpipe tobacco (WT) use,<sup>2</sup> even though WTS causes respiratory illnesses, cardiovascular diseases and adverse perinatal outcomes.<sup>3</sup> These factors have helped WTS become more socially acceptable, especially among youth<sup>4,5</sup> and women.<sup>6,7</sup>

WT use has extended beyond the East, where it has been present for decades, and is increasingly popular in the West, where WTS rates have reached 10% among some young adult populations in the United States and the UK.<sup>8,9</sup> The WHO Eastern Mediterranean Region (EMR) remains home to the highest WTS rates worldwide;<sup>1,10</sup> in some EMR countries, WTS has surpassed cigarette smoking in females and adolescents.<sup>11,12</sup> In Egypt, adolescent girls (3.4%)<sup>13</sup> and university students (12.2%)<sup>14</sup> report higher WTS rates than their older counterparts (0.3% in women<sup>13</sup> and 6.2% in men<sup>15</sup>), and rurally-located Egyptian males smoke WT more (7.5%) than men living in urban regions (4.9%).<sup>15</sup> This global surge in WTS makes examining the perceived effectiveness of existing WT control policies important to inform a much needed WT regulatory framework.<sup>16-18</sup>

Applying health warnings to tobacco products can cost-effectively increase public awareness of smoking's risks, increase the likelihood of quitting among smokers, and deter smoking initiation among non-smokers.<sup>19</sup> These outcomes are mediated by several measures of effectiveness that have been organized, based on behavioural theories, within conceptual frameworks of health



1  
2  
3 warning impact.<sup>20-23</sup> In line with this evidence, guidelines for implementing Article 11 of the  
4 WHO's Framework Convention on Tobacco Control (WHO FCTC) call for on-pack pictorial  
5 health warnings (PHWs), and recommend plain packaging and increasing warning size.<sup>24</sup> Egypt,  
6 a signatory country to the WHO FCTC, has applied generic PHWs to waterpipe tobacco packs  
7 (WTPs).<sup>25</sup> Since 2008, a set of four PHWs has appeared on the bottom half of the front and back  
8 of WTPs; these warnings carry the quitline number and rotate every two years.<sup>26</sup> However,  
9 WTPs still depict colourful fruits and flavours in brand imagery.<sup>26</sup>

10  
11  
12 Several observational<sup>27</sup> and experimental studies,<sup>20</sup> suggest plain packaging with larger PHWs<sup>28</sup>  
13 could more effectively reduce tobacco smoking through increasing warning salience, making the  
14 packaging and smoking less appealing, and reducing misperceptions about product harm,<sup>29,30</sup>  
15 especially in non-smokers or non-established smokers.<sup>31</sup> Yet, while this evidence is encouraging,  
16 these studies have focussed largely on cigarettes and we know little about how PHWs could  
17 reduce non-cigarette tobacco use, particularly WTS.<sup>32</sup>

18  
19  
20 To our knowledge, only a few studies have examined the impact of WT PHWs: two online  
21 surveys from Canada and the United States,<sup>33,34</sup> two qualitative studies from the UK<sup>35</sup> and the  
22 EMR,<sup>36</sup> and one recent Egyptian survey.<sup>37</sup> The two online surveys tested hypothetical warnings  
23 shown on computer screens rather than on WTPs and examined the effectiveness of text-only  
24 versus PHWs.<sup>33,34</sup> Both studies found that PHWs had a modest impact on established waterpipe  
25 smokers.<sup>33,34</sup> The UK qualitative study found that when warnings increased in size and packs  
26 became less branded, participants felt WTPs were less attractive and warnings were more  
27 impactful.<sup>35</sup> EMR study participants reported that PHWs improved respondents' knowledge

1  
2  
3 about WTS health hazards.<sup>36</sup> These studies are important but were confined to waterpipe  
4 smokers;<sup>33-36</sup> while it is important to examine how WT PHWs might pertain to both smokers and  
5 non-smokers. The Egyptian study reported that only half of 1048 waterpipe smoker and non-  
6 smoker participants thought that existing PHWs on WTPs were visible; they expressed varying  
7 views on the effectiveness of WT PHWs across several measures (such as salience, credibility,  
8 perceived harm, affective reactions).<sup>37</sup> However, this survey did not examine whether  
9 participants perceived existing WT PHWs effective in deterring uptake or quitting of WTS.  
10  
11  
12  
13  
14  
15  
16  
17  
18  
19  
20

21 Given rising WTS rates in Egypt, in 2015 the Tobacco Control Unit in the Egyptian Ministry of  
22 Health proposed amending PHW regulations and introducing plain packaging. Specifically, it  
23 recommended increasing PHW size to 80% of the pack surface, and removing colours and  
24 flavour imagery from tobacco packs. Preliminary evidence on the potential effects of this  
25 approach was required. Qualitative methods are particularly useful in exploring understudied  
26 areas.<sup>38,39</sup> To inform WT labelling policy, we conducted this qualitative study to explore how  
27 participants perceived existing PHWs on WTPs, assessed how they interpreted plain packaging  
28 of WT featuring enhanced PHWs, and probed perceptions of how existing and novel sets would  
29 affect uptake or cessation of WTS.  
30  
31  
32  
33  
34  
35  
36  
37  
38  
39  
40  
41  
42  
43  
44

## 45 **METHODS**

### 46 **Design**

47 The study comprised ten focus group discussions and ten in-depth interviews that took place in  
48 urban and semi-urban regions in Cairo, and a rural area in Menoufia governorate. We utilized  
49 both focus groups and in-depth interviews as complementary approaches; focus groups explored  
50  
51  
52  
53  
54  
55  
56  
57  
58  
59  
60

1  
2  
3 participants' interactions and whether and how consensus views evolved while in-depth  
4 interviews allowed detailed probing and deeper understanding of participants' views.<sup>38,39</sup> Some  
5 sessions were conducted in WTS usage settings, such as cafes, where we observed social and  
6 cultural dynamics of WTS and assessed WT PHW's visibility to others.  
7  
8  
9  
10  
11  
12  
13

14 Our conceptual framework drew on the theory of planned behavior,<sup>40</sup> as outlined in IARC  
15 Handbooks of Cancer Prevention, Tobacco Control, Methods for Evaluating Tobacco Control  
16 Policies 2008.<sup>23</sup> We explored policy-relevant outcomes with respect to the perceived potential  
17 effect on WTS uptake and cessation, and probed factors related to PHW content and WTP  
18 design, including salience, affective reactions, perceived harm and credibility. This study was  
19 approved by the Ethical Review Board of the Faculty of Medicine, Ain Shams University  
20 (FMASU R 10/2015). We used SRQR guidelines for reporting qualitative research.<sup>41</sup>  
21  
22  
23  
24  
25  
26  
27  
28  
29  
30  
31  
32

### 33 **Sample**

34  
35 Our sample comprised men and women, 18 years of age or older, who lived in rural, urban, and  
36 semi-urban locations. We included self-identified waterpipe smokers (exclusive WT or dual  
37 users of WT and cigarettes) and non-smokers (non-users of any tobacco product), as we were  
38 interested in how warnings could influence WTS initiation as well as cessation. Participants were  
39 recruited using snowball sampling;<sup>42</sup> we explained the study purpose to people who made  
40 contact, invited them to participate in a one-on-one interview or focus group, and then set a  
41 meeting date and time. Participants did not discernibly differ by type of interview chosen.  
42  
43  
44  
45  
46  
47  
48  
49  
50  
51  
52  
53

54 In total, 90 individuals participated, including 80 in homogenous focus groups (with respect to  
55  
56  
57  
58  
59  
60

1  
2  
3 age, gender, smoking status) with 6–8 individuals per group, and 10 in in-depth interviews (**see**  
4 **Supplementary Table 1**). As WT use in Egypt is generally higher among males,<sup>15</sup> more males  
5 participated in our sessions. **Supplementary Table 2** contains details of participants'  
6 demographic characteristics.  
7  
8  
9  
10

## 11 **Tools**

### 12 *Interview Guide*

13  
14  
15 We developed the interview guide in Egyptian colloquial Arabic and incorporated qualitative  
16 measures used to assess tobacco labelling policies.<sup>23</sup> We pilot tested the interview guide for  
17 clarity and comprehensiveness, tested the appropriateness of our prompts and questions after the  
18 pilot sessions, and made modifications following discussions with the research team. We used  
19 the same guide with focus groups and in-depth interviews and probed participants' experiences  
20 of WTS, their knowledge of WT PHWs, their views on the existing and novel PHWs on WTPs,  
21 and their perceptions of placing PHWs on waterpipe devices (**see Supplementary for interview**  
22 **guide**). In this article, we focus on discussing PHWs on WTPs.  
23  
24  
25  
26  
27  
28  
29  
30  
31  
32  
33  
34  
35  
36  
37  
38  
39

### 40 *Pictorial Health Warnings on Waterpipe Tobacco Packs*

41  
42 The existing PHWs depicted cancers of lung, throat, mouth, and face, covered 50% of the lower  
43 surface of the front and back of the WTP against a colourful background depicting fruit and  
44 flavour imagery. The warnings included pictures, generic text and the quitline number (**Figure**  
45 **1A**).  
46  
47  
48  
49  
50

51  
52  
53 We adapted novel PHWs from a health warning database<sup>43</sup> and followed WHO FCTC  
54  
55  
56  
57

1  
2  
3 recommendations for plain packaging<sup>24,44</sup> building on the proposal of the Tobacco Control Unit  
4 of the Egyptian Ministry of Health; the PHW thus covered 80% of the upper surface of the front  
5 and back of the WTP against a dark uniform plain background not depicting any fruit or flavour  
6 imagery, with the remaining 20% depicting only the brand name in standardised font. The novel  
7 PHWs included pictures, text and the quitline number. We applied newly designed PHWs to  
8 used WTPs to promote authenticity. We pilot tested health warnings messages with  
9 corresponding images for clarity and comprehension: (“Smoking kills,” “Smoking causes lung  
10 cancer”, “Smoking causes clotting of blood vessels”, “Smoking causes blindness”, “Smoking  
11 during pregnancy harms fetus”, and “Don’t let your children inhale your smoke”). The warnings  
12 used were selected following discussions amongst the research team and feedback from pilot  
13 sessions, and reflected the best available evidence on WTS health outcomes.<sup>45</sup> WTS share  
14 common harms with those caused by cigarette smoking.<sup>3</sup> We sought topical content showing less  
15 severe harms than those depicted in existing PHWs. The four novel warnings selected included  
16 the effect of smoking during pregnancy on the fetus, effects of peripheral vascular diseases  
17 affecting the feet and eye, and effects on teeth and gums (**Figure 1 B**). Although it was important  
18 to adapt the textual message to be waterpipe-specific, we did not test this in the study reported  
19 here; this was assessed separately in another study of our research project.  
20  
21  
22  
23  
24  
25  
26  
27  
28  
29  
30  
31  
32  
33  
34  
35  
36  
37  
38  
39  
40  
41  
42  
43

## 44 **Data Collection**

45  
46 Data were collected from October 2015 to February 2016 at the Faculty of Medicine, Ain Shams  
47 University in Cairo (five focus groups and five in-depth interviews), and at participants’ homes  
48 or in cafés for those in rural and semi-urban areas (five focus groups and five in-depth  
49 interviews). All participants received an information letter explaining the study and were asked  
50  
51  
52  
53  
54  
55  
56  
57  
58  
59  
60

1  
2  
3 to provide verbal consent prior to each discussion or interview commencing. Participants were  
4  
5 advised their data and identity would be confidential, and told they could withdraw from the  
6  
7 study at any time.  
8

9  
10 Each focus group or interview was moderated by two of the co-authors (AM, WS, ME, and WM)  
11  
12 and audio-recorded; each session was about one hour long. The facilitator and note taker  
13  
14 regularly switched roles to promote reflection, and the wider team critically reflected on the  
15  
16 interviews during team meetings. The facilitators followed standard procedures when discussing  
17  
18 the interview guide topics and introduced the PHW stimuli when the relevant topic was opened  
19  
20 for discussion. No further sessions were scheduled once data saturation had been reached, i.e. no  
21  
22 new themes were being generated during the discussions.<sup>46</sup>  
23  
24  
25  
26  
27

## 28 **Analysis**

29  
30 Two authors independently transcribed verbatim the recorded sessions and compared the two  
31  
32 transcripts to ensure inclusivity and accuracy (WH, HM); a third author (AM) resolved any  
33  
34 discrepancies. Considering the identical aims and topics explored, data from focus groups and  
35  
36 interviews were analyzed together. We analysed the data using a thematic approach.<sup>47,48</sup> We  
37  
38 coded transcripts as the study progressed using a three-phase process that began by organizing  
39  
40 ideas in relation to the research questions, then involved independent reviews of transcripts to  
41  
42 identify preliminary themes and create an initial coding list.<sup>49</sup> We finally independently refined  
43  
44 this list (AM, AA), added new codes where appropriate, and developed broader themes, that one  
45  
46 author (HM) then reviewed across all cases. We resolved minor inconsistencies during  
47  
48 discussion sessions and after extensive reviews of transcripts before we finalized the themes and  
49  
50 subthemes (**see Supplementary Table 3**). In this article, we focus on policy-relevant outcomes  
51  
52  
53  
54  
55  
56  
57

1  
2  
3 relevant to PHWs on WTPs as described above in methods “design”.  
4  
5  
6  
7  
8  
9

## 10 **RESULTS**

11  
12 The 90 participants in focus groups and interviews comprised more males (72.2%) than females  
13 (27.8%) and participants’ mean age was 33.4 ±11.6 (see **Supplementary Table 2**). We  
14 identified the overall themes: warning label content and pack design features, and discuss these  
15 in relation to WTS uptake and cessation comparing throughout existing and novel sets. We  
16 report below results from both focus groups and individual interviews. We cite exemplar  
17 quotations below and provide a more detailed set of quotations in **Supplementary Table 4**,  
18 where we also indicate the gender, age group, smoking status, and location of participants.  
19  
20  
21  
22  
23  
24  
25  
26  
27  
28  
29

30  
31 Most participants were aware of warning labels on WTPs and reported seeing these when  
32 purchasing or preparing their tobacco. However, those using waterpipes in cafes or were less  
33 likely to see WTPs as WT was prepared out of their sight *“I was downtown and we saw smokers  
34 in cafes but shisha is always served ready...I never saw the packs”* (Female non-smoker, >25y,  
35 semi-urban).  
36  
37  
38  
39  
40  
41  
42

### 43 **Warning label content – perceived likely effect of existing and novel PHWs**

44  
45 Participants who were aware of existing WTP warnings recalled these as disturbing; however,  
46 several felt these warnings had limited impact. Many recalled the lung cancer PHW and the text  
47 “smoking is hazardous to health and causes death” as the most believable warning, yet also the  
48 least impactful, because of wearout: *“...the other warnings like the lung cancer one...people got  
49 used to them after a while”* (Male smoker, >25y, rural). Participants found the existing  
50  
51  
52  
53  
54  
55  
56  
57  
58  
59  
60

1  
2  
3 warnings, which all featured cancer-related harms, frightening and disgusting, and non-smokers,  
4 particularly, avoided looking at them. Nonetheless, several questioned the harms existing PHWs  
5 featured and saw these as exaggerated: *"I don't want to look at it from near or far...they want to*  
6 *send us a message that it is harmful but in an awful and overstating way"* (Female, smoker,  
7 <25y, urban).

8  
9  
10 Some also found existing warnings difficult to understand: *"It looks like a bad thing but it is not*  
11 *clear what it is"* (Female, non-smoker, >25y, semi-urban". These participants saw existing  
12 PHWs as unconvincing and exaggerated as they had not seen such conditions in real life and  
13 sometimes knew people who had smoked for many years with apparent impunity: *"I have seen*  
14 *the warning on the packs but I have never seen anything such as that in real life...I know a*  
15 *person who has been smoking since the eighties and nothing happened to him"* (Male smoker,  
16 >25y, rural).

17  
18  
19 Participants often denied risks associated with occasional smoking; one exempted himself from  
20 harm on the grounds that he did not smoke heavily and had seen no direct evidence of the harms  
21 presented in PHWs: *"I don't think I can be affected by smoking, because I don't smoke heavily;*  
22 *only once a day, besides...we have never seen the conditions in the warnings in real life"* (Male  
23 smoker, >25y, rural). Several thought harms would not occur until they were older, and believed  
24 that, if and when they experienced these, they could quit.

25  
26  
27 By contrast, most participants favoured the new PHWs, which they first viewed during the  
28 interview sessions. They found these clearer, more understandable and realistic than existing  
29 PHWs, and more likely to capture their attention. Participants also commented that the new



1  
2  
3 PHWs were easily understood even without text and thus likely to be effective among people  
4  
5 with varying literacy: *"This one is more realistic for its purpose and understandable; even*  
6  
7 *without any text...it is a more convincing warning"* (Female non-smoker, >25y, semi-urban).  
8  
9

10  
11 Specifically, participants found the new warnings featuring more immediate, proximal risks had  
12  
13 the strongest perceived impact, particularly those showing harmful effects on teeth. Female  
14  
15 participants also felt strongly affected by the PHW illustrating harm to unborn babies, which  
16  
17 forced them to confront the harm they imposed on others: *"The baby warning is effective*  
18  
19 *because it is not about me anymore...This is something way more important than me...I fear for*  
20  
21 *my kid more than I fear for myself"* (Female non-smoker >25y, semi-urban). However, some  
22  
23 continued to see images showing potential harms they may experience still as overstated and  
24  
25 unlikely to happen in the near future: *"This didn't happen before to anyone (foot*  
26  
27 *warning)...we're still young...we won't get this"* (Female smoker, <25y, urban).  
28  
29  
30  
31

32  
33  
34 Although participants saw the new PHWs as more effective, they suggested improvements to the  
35  
36 warning content. In line with earlier comments about perceived exaggeration, they sought greater  
37  
38 credibility: *"It is very important that you convince me...put something there that I'll believe"*  
39  
40 *(Male smoker, >25y, semi-urban)*. They suggested presenting testimonials: *"Show smokers live*  
41  
42 *people who were damaged because of shisha smoking and others who quit and improved"* (Male  
43  
44 non-smoker, >25y, rural).  
45  
46  
47  
48  
49

50  
51 Participants recommended illustrating the effects WTS has on women by featuring relevant  
52  
53 cancers and congenital diseases: *"Direct warnings addressing women like cancer of the breast or*  
54  
55 *the uterus or congenital anomalies to the fetus"* (Female, non-smoker, >25y, semi-urban". Some  
56  
57

1  
2  
3 also thought PHWs targeting women could encourage them to persuade their partners to quit.  
4  
5  
6

7  
8 Several participants thought PHWs should target youth before they start smoking and suggested  
9  
10 warnings showing how WTS smokers' social relationships (e.g., sexual dysfunction warnings)  
11  
12 would have high impact: *"We want a real effect that already happened...like for example the*  
13  
14 *side effects on sexual functioning...that will definitely affect smokers"* (Male non-smoker, >25 y,  
15  
16 *rural*).  
17

18  
19 In addition, participants also suggested printing text warnings including details of the hazardous  
20  
21 ingredients of smoke, with more information on health risks and cessation options inserted on the  
22  
23 inside or outside of the WTP, together with external PHWs would promote cessation behaviour,  
24  
25 and would enhance the impact of novel warnings.  
26  
27

### 28 29 30 31 **Design Features of WTPs – perceived likely effect of existing and novel PHWs**

32  
33 As well as responding to the different warning content, participants also noted that the different  
34  
35 design elements used in the novel PHWs had improved the impact these had. Several commented  
36  
37 on how bright colours and fruit imagery deflected attention away from PHWs and promoted  
38  
39 experimentation: *"The peach drawing is appetizing... [and] drawing attention away from the*  
40  
41 *warning...better put the warning on the top! The pack should be dark...this colour is very*  
42  
43 *bright... just like bonbon packs"* (Female non-smoker, >25y, semi-urban). They found it difficult  
44  
45 to associate fruit flavours with harm and thought the images invited trial: *"The pictures and the*  
46  
47 *smell of fruits make a passerby want to try them all"* (Female non-smoker, >25y, semi-urban).  
48  
49  
50  
51

52  
53  
54 By contrast, participants thought the plain background, contrasting colours, absence of fruit and  
55  
56  
57

1  
2  
3 flavour images, and larger warning images shown on the proposed new PHWs increased impact,  
4 reduced distraction, and encouraged participants to look more closely at the pack. One noted:  
5  
6  
7  
8 *“Here the picture is bigger and the text has a clear message...together with this dark colour...it*  
9  
10 *makes me focus only on the warning...all this makes it more effective”* (Male smoker, <25y,  
11  
12 *urban*). Together, the altered content and enhanced design attributes increased participants’  
13  
14 perceptions of the impact the novel PHWs would have.  
15  
16  
17  
18

19 Overall, most waterpipe smoker and non-smoker participants thought PHWs would deter non-  
20  
21 smokers from trying WTS but were less optimistic about the effects on smokers. One noted: *“If*  
22  
23 *we (non-smokers) lusted to smoke it and saw pictures like these...we won’t smoke, but those who*  
24  
25 *do actually smoke already would be indifferent”* (Male non-smoker, >25, urban). Smokers  
26  
27 themselves also felt PHWs had less effect because they had become accustomed to seeing the  
28  
29 images: *“I used to think about the hazards a lot when the pictures first appeared...then I got*  
30  
31 *used to them...I don’t pay them attention anymore”* (Male smoker, <25y, semi-urban). Others  
32  
33 reported using stickers to obscure PHWs or avoiding packs with PHWs they found particularly  
34  
35 confronting: *“I avoid buying the picture of the tongue in particular* (referring to the mouth cancer  
36  
37 warning)*”* (Male smoker, <25y, semi-urban)  
38  
39  
40  
41  
42  
43  
44

45 As with the current PHWs, most waterpipe smoker and non-smoker participants thought the  
46  
47 proposed PHWs would have a stronger effect on non-smokers than on long-term smokers,  
48  
49 though some indicated they would avoid some warnings and may reduce their WTS: *“If I go to*  
50  
51 *buy moassel (waterpipe tobacco) and found this pack, I’ll go to another shop to buy another*  
52  
53 *one...if I don’t find a picture that makes me comfortable...I won’t smoke that day...but if they’re*  
54  
55  
56  
57  
58  
59  
60

1  
2  
3 *all like this...I guess I'll try to quit...or... at least decrease my habit” (Male smoker, >25 y,*  
4 *rural). In general, participants thought that the new PHW set had greater potential to deter WTS,*  
5 *especially among new smokers: “If I'll smoke and saw it... for sure I won't smoke at the*  
6 *moment...it's disgusting” (Male non-smoker, <25y, rural).*  
7  
8  
9  
10  
11  
12  
13

## 14 **DISCUSSION**

15  
16  
17 Our qualitative study found that participants privileged the short-term benefits they received over  
18 the longer-term risks they faced. They saw existing PHWs as less likely to influence long-term  
19 smokers, whose prolonged and repetitive exposure to PHWs appeared to have diminished their  
20 response to these aversive stimuli.<sup>50</sup> Older adult waterpipe users typically dismissed risks  
21 associated with WTS, especially if they had not experienced any health effects. This finding is  
22 consistent with other studies that found age is negatively associated with perceived risks of  
23 smoking and with attention to either graphic or text warnings on tobacco packages.<sup>51</sup>  
24  
25  
26  
27  
28  
29  
30  
31  
32  
33  
34

35 However, the existing PHWs and the novel PHWs tested appeared more likely to influence non-  
36 smokers and less-experienced smokers by creating awareness of the health risks WTS presents.  
37 These findings are in line with previous research<sup>31</sup> and address McNeill et al.'s call in their  
38 recent review on plain packaging for further research into the effects of tobacco packaging on  
39 smoking uptake,<sup>52</sup> and we provide preliminary evidence that presenting WT in plain packaging  
40 could deter non-smokers from experimenting with WTS.  
41  
42  
43  
44  
45  
46  
47  
48  
49  
50

51 Our findings that novel warnings with clear and large visual elements could challenge perceived  
52 immediate benefits and enhance risk perception and acceptance is consistent with earlier work  
53  
54  
55  
56  
57

1  
2  
3 and suggest presenting PHWs on WTS products featuring plain packaging could cue cessation.<sup>35</sup>  
4  
5 More generally, our findings suggest a warning evaluation and regular refreshment programme  
6  
7 may be important to ensure warning salience and avoid wearout.  
8  
9

10  
11  
12 Although existing PHWs induced strong negative emotional reactions, several participants  
13  
14 viewed these warnings as exaggerated and felt the health risk depicted was unlikely to occur.  
15  
16 While PHWs that arouse fear may increase risk perceptions, they did not necessarily promote  
17  
18 greater message acceptance; our findings are thus consistent with earlier studies that reported  
19  
20 highly confronting PHWs could have little effect on behaviour or even elicit adverse  
21  
22 responses,<sup>53,54</sup> although other studies suggest that the higher negative affect aroused, the stronger  
23  
24 the response elicited.<sup>55</sup> Our findings also show a complex relationship between the emotional  
25  
26 response elicited and the salience and perceived impact of a message. The PHW depicting oral  
27  
28 harm was minimally disturbing, yet participants saw it as the strongest and the most salient  
29  
30 warning; by contrast, participants regarded the confronting vascular harm PHW as less effective  
31  
32 because the condition was less salient and seen as more distal. As well as the image salience and  
33  
34 affect aroused, the temporal framing is important and PHWs illustrating short-term harms were  
35  
36 thought more effective. Our findings thus support earlier studies analysing the relationship  
37  
38 between risk perception, believability, and temporal distance.<sup>56</sup>  
39  
40  
41  
42  
43  
44  
45  
46

47 Young adults and women found gender- and age-specific messages more persuasive. Evidence  
48  
49 that WTS could be predicted by age and gender-related indicators,<sup>57</sup> suggests strategies targeting  
50  
51 young adults and women are crucially important, particularly as these demographics perceive  
52  
53 messages differently from older adults.<sup>58</sup> For example, messages about negative health effects  
54  
55  
56  
57

1  
2  
3 from passive smoking, sexual dysfunction and intimacy, miscarriages, and harmful effects on  
4 infants and children were considered more persuasive among younger adults and women than  
5 other messages.  
6  
7  
8  
9

10  
11  
12 Another plausible approach suggested by participants in our study was to develop a visible and  
13 sensible message in both text and graphic formats that target waterpipe smokers with detailed  
14 cessation information inserted on the WTP. This recommendation is consistent with that of an  
15 earlier study that found that combined text and graphic warnings elicit adverse reactions to  
16 smoking among non-smokers and smokers,<sup>59</sup> especially on the sustainability of quit behaviour.<sup>60</sup>  
17  
18 In line with these suggestions, the design of novel warnings helped make the cessation quit line  
19 more prominent by the contrasting dark plain background.  
20  
21  
22  
23  
24  
25  
26  
27  
28

29  
30  
31 We also found specific design elements that could inform future PHW development. Some  
32 participants thought plain packs increased the salience and effectiveness of the warnings, and  
33 reduced the appeal of the packaging and misperceptions of harm. These findings are consistent  
34 with the literature on plain packaging.<sup>44,52</sup> Evidence that flavoured cigarettes reduce harm  
35 perceptions appears relevant to WT<sup>61,62</sup> as participants noted that images of fruits or appealing  
36 flavours attracted them to WTS and deflected their attention from warning information. The  
37 novel warnings tested were presented as vivid images with a contrasting dark plain background  
38 and had no association with fruits or flavours. These PHWs had a stronger visual impact and  
39 were considered more salient than the PHWs currently used in Egypt. Some recommended that  
40 attractive imagery and flavour attributes should be banned. Furthermore, clarity of the pictures  
41 and presenting them in larger sizes played a role in enhancing acceptance and risk perception  
42  
43  
44  
45  
46  
47  
48  
49  
50  
51  
52  
53  
54  
55  
56  
57  
58  
59  
60

1  
2  
3 among participants, a finding also reported by Jawad and colleagues.<sup>35</sup>  
4  
5  
6

7  
8 See **Strengths and Limitations** in **Supplementary file (page 8)**.  
9

### 10 11 12 *Conclusions*

13  
14 PHWs on WTPs have the potential to reduce uptake and cue quit attempts but might be more  
15 effective if PHWs used more impactful designs. Specifically, PHWs using contrasting  
16 background colours and plain packaging, offering no association to fruits or flavours, targeting  
17 age and gender, displaying proximal health risks, might enhance both warning impact and risk  
18 perception. Our exploratory study provides preliminary evidence of the potential effectiveness of  
19 WT products that carry enhanced warnings with plain packaging and suggests alternative designs  
20 and contents that could be further developed and tested in other studies. Policymakers designing  
21 and implementing health warnings on WT products now have clearer evidence on which to base  
22 their  
23  
24  
25  
26  
27  
28  
29  
30  
31  
32  
33  
34  
35  
36  
37  
38  
39  
40  
41  
42  
43  
44  
45  
46  
47  
48  
49  
50  
51  
52  
53  
54  
55  
56  
57  
58  
59  
60  
61  
62  
63  
64  
65  
66  
67  
68  
69  
70  
71  
72  
73  
74  
75  
76  
77  
78  
79  
80  
81  
82  
83  
84  
85  
86  
87  
88  
89  
90  
91  
92  
93  
94  
95  
96  
97  
98  
99  
100  
101  
102  
103  
104  
105  
106  
107  
108  
109  
110  
111  
112  
113  
114  
115  
116  
117  
118  
119  
120  
121  
122  
123  
124  
125  
126  
127  
128  
129  
130  
131  
132  
133  
134  
135  
136  
137  
138  
139  
140  
141  
142  
143  
144  
145  
146  
147  
148  
149  
150  
151  
152  
153  
154  
155  
156  
157  
158  
159  
160  
161  
162  
163  
164  
165  
166  
167  
168  
169  
170  
171  
172  
173  
174  
175  
176  
177  
178  
179  
180  
181  
182  
183  
184  
185  
186  
187  
188  
189  
190  
191  
192  
193  
194  
195  
196  
197  
198  
199  
200  
201  
202  
203  
204  
205  
206  
207  
208  
209  
210  
211  
212  
213  
214  
215  
216  
217  
218  
219  
220  
221  
222  
223  
224  
225  
226  
227  
228  
229  
230  
231  
232  
233  
234  
235  
236  
237  
238  
239  
240  
241  
242  
243  
244  
245  
246  
247  
248  
249  
250  
251  
252  
253  
254  
255  
256  
257  
258  
259  
260  
261  
262  
263  
264  
265  
266  
267  
268  
269  
270  
271  
272  
273  
274  
275  
276  
277  
278  
279  
280  
281  
282  
283  
284  
285  
286  
287  
288  
289  
290  
291  
292  
293  
294  
295  
296  
297  
298  
299  
300  
301  
302  
303  
304  
305  
306  
307  
308  
309  
310  
311  
312  
313  
314  
315  
316  
317  
318  
319  
320  
321  
322  
323  
324  
325  
326  
327  
328  
329  
330  
331  
332  
333  
334  
335  
336  
337  
338  
339  
340  
341  
342  
343  
344  
345  
346  
347  
348  
349  
350  
351  
352  
353  
354  
355  
356  
357  
358  
359  
360  
361  
362  
363  
364  
365  
366  
367  
368  
369  
370  
371  
372  
373  
374  
375  
376  
377  
378  
379  
380  
381  
382  
383  
384  
385  
386  
387  
388  
389  
390  
391  
392  
393  
394  
395  
396  
397  
398  
399  
400  
401  
402  
403  
404  
405  
406  
407  
408  
409  
410  
411  
412  
413  
414  
415  
416  
417  
418  
419  
420  
421  
422  
423  
424  
425  
426  
427  
428  
429  
430  
431  
432  
433  
434  
435  
436  
437  
438  
439  
440  
441  
442  
443  
444  
445  
446  
447  
448  
449  
450  
451  
452  
453  
454  
455  
456  
457  
458  
459  
460  
461  
462  
463  
464  
465  
466  
467  
468  
469  
470  
471  
472  
473  
474  
475  
476  
477  
478  
479  
480  
481  
482  
483  
484  
485  
486  
487  
488  
489  
490  
491  
492  
493  
494  
495  
496  
497  
498  
499  
500  
501  
502  
503  
504  
505  
506  
507  
508  
509  
510  
511  
512  
513  
514  
515  
516  
517  
518  
519  
520  
521  
522  
523  
524  
525  
526  
527  
528  
529  
530  
531  
532  
533  
534  
535  
536  
537  
538  
539  
540  
541  
542  
543  
544  
545  
546  
547  
548  
549  
550  
551  
552  
553  
554  
555  
556  
557  
558  
559  
560  
561  
562  
563  
564  
565  
566  
567  
568  
569  
570  
571  
572  
573  
574  
575  
576  
577  
578  
579  
580  
581  
582  
583  
584  
585  
586  
587  
588  
589  
590  
591  
592  
593  
594  
595  
596  
597  
598  
599  
600  
601  
602  
603  
604  
605  
606  
607  
608  
609  
610  
611  
612  
613  
614  
615  
616  
617  
618  
619  
620  
621  
622  
623  
624  
625  
626  
627  
628  
629  
630  
631  
632  
633  
634  
635  
636  
637  
638  
639  
640  
641  
642  
643  
644  
645  
646  
647  
648  
649  
650  
651  
652  
653  
654  
655  
656  
657  
658  
659  
660  
661  
662  
663  
664  
665  
666  
667  
668  
669  
670  
671  
672  
673  
674  
675  
676  
677  
678  
679  
680  
681  
682  
683  
684  
685  
686  
687  
688  
689  
690  
691  
692  
693  
694  
695  
696  
697  
698  
699  
700  
701  
702  
703  
704  
705  
706  
707  
708  
709  
710  
711  
712  
713  
714  
715  
716  
717  
718  
719  
720  
721  
722  
723  
724  
725  
726  
727  
728  
729  
730  
731  
732  
733  
734  
735  
736  
737  
738  
739  
740  
741  
742  
743  
744  
745  
746  
747  
748  
749  
750  
751  
752  
753  
754  
755  
756  
757  
758  
759  
760  
761  
762  
763  
764  
765  
766  
767  
768  
769  
770  
771  
772  
773  
774  
775  
776  
777  
778  
779  
780  
781  
782  
783  
784  
785  
786  
787  
788  
789  
790  
791  
792  
793  
794  
795  
796  
797  
798  
799  
800  
801  
802  
803  
804  
805  
806  
807  
808  
809  
810  
811  
812  
813  
814  
815  
816  
817  
818  
819  
820  
821  
822  
823  
824  
825  
826  
827  
828  
829  
830  
831  
832  
833  
834  
835  
836  
837  
838  
839  
840  
841  
842  
843  
844  
845  
846  
847  
848  
849  
850  
851  
852  
853  
854  
855  
856  
857  
858  
859  
860  
861  
862  
863  
864  
865  
866  
867  
868  
869  
870  
871  
872  
873  
874  
875  
876  
877  
878  
879  
880  
881  
882  
883  
884  
885  
886  
887  
888  
889  
890  
891  
892  
893  
894  
895  
896  
897  
898  
899  
900  
901  
902  
903  
904  
905  
906  
907  
908  
909  
910  
911  
912  
913  
914  
915  
916  
917  
918  
919  
920  
921  
922  
923  
924  
925  
926  
927  
928  
929  
930  
931  
932  
933  
934  
935  
936  
937  
938  
939  
940  
941  
942  
943  
944  
945  
946  
947  
948  
949  
950  
951  
952  
953  
954  
955  
956  
957  
958  
959  
960  
961  
962  
963  
964  
965  
966  
967  
968  
969  
970  
971  
972  
973  
974  
975  
976  
977  
978  
979  
980  
981  
982  
983  
984  
985  
986  
987  
988  
989  
990  
991  
992  
993  
994  
995  
996  
997  
998  
999  
1000

1  
2  
3 **ACKNOWLEDGEMENTS** The authors are grateful to the participants of this research and  
4 whose responses provided the basis for this article. We thank Joe Petrik for editing and  
5 proofreading an earlier version of this manuscript. Both the current set of PHWs and the  
6 alternative set of PHWs presented in this study were used after signing a written partnership  
7 agreement between the Tobacco Control Unit in the Egyptian Ministry of Health and the  
8 research team.  
9

10  
11  
12 **AUTHOR CONTRIBUTORS** AM conceived and designed the study and developed its tools.  
13 AM, ME, WS, WM carried out the study. SL and AM sought necessary approvals for using the  
14 existing set of PHWs. WM and HM transcribed the data. AA, HM, AM and JH analyzed the  
15 data. AM, HM, AA and JH drafted the paper. All authors critically revised contents and provided  
16 final approval on the submitted manuscript.  
17

18  
19  
20 **FUNDING** This work was supported by the International Development Research Center (IDRC)  
21 through the American University of Beirut, the Tobacco Control Research Group, to study  
22 waterpipe tobacco smoking prevention and intervention programs in the region, as a part of the  
23 project “Shaping Research for Health in the Arab World: A Systems and Network Approach to  
24 Advance Knowledge, Inform Policy, and Promote Public Health” (Award 102518)  
25

26  
27  
28 **COMPETING INTERESTS** None declared.  
29

30  
31  
32 **ETHICS APPROVAL** This study was approved by the Research Ethics Committee of Faculty  
33 of Medicine, Ain Shams University (FMASU R 10/2015).  
34

35  
36  
37 **CHECKLIST FOR REPORTING GUIDELINES** We used SRQR guidelines for reporting  
38 qualitative research.  
39



**DATA SHARING STATEMENT** No additional data are available.

## REFERENCES

1. Maziak W, Ben Taleb Z, Bahelah R, et al. The global epidemiology of waterpipe smoking. *Tob Control* 2015;24(1):i3-i12. doi:10.1136/tobaccocontrol-2014-051903.
2. Jawad M. Waterpipe Tobacco Smoking: A less Harmful Alternative? In: Loddenkemper R, Kreuter M (eds): *The Tobacco Epidemic*, ed 2, rev. and ext. Prog Respir Res. Basel, Karger, 2015;42:252-257. doi:10.1159/000369505.
3. Waziry R, Jawad M, Ballout RA, et al. The effects of waterpipe tobacco smoking on health outcomes: an updated systematic review and meta-analysis. *Int J Epidemiol* 2017;46(1):32-43. doi:10.1093/ije/dyw021.
4. Soule EK, Lipato T, Eissenberg T. Waterpipe tobacco-smoking: a new smoking epidemic among the young? *Curr Pulmonol Rep* 2015;4(4):163-172. doi:10.1007/s13665-015-0124-6.
5. Akl EA, Ward KD, Bteddini D, et al. The allure of the waterpipe: a narrative review of factors affecting the epidemic rise in waterpipe smoking among young persons globally. *Tob Control* 2015;24:i13-i21. doi:10.1136/tobaccocontrol-2014-051906.
6. Akl EA, Gunukula SK, Aleem S, et al. The prevalence of waterpipe tobacco smoking among the general and specific populations: a systematic review. *BMC Public Health* 2011;11:244. doi:10.1186/1471-2458-11-244.
7. Khalil J, Afifi R, Fouad FM, et al. Women and Waterpipe Tobacco Smoking in the Eastern Mediterranean Region: Allure or Offensiveness? *Women & Health* 2013;53(1):100-116. doi:10.1080/03630242.2012.753978.
8. Cobb C, Ward KD, Maziak W, et al. Waterpipe tobacco smoking: An emerging health crisis in the United States. *Am J Health Behav* 2010;34(3):275-285. PMID: PMC3215592.

- 1  
2  
3 9. Grant A, Morrison R, Dockrell RJ. The Prevalence of waterpipe (Shisha, Narghille, Hookah)  
4 use among adults in great britain, and factors associated with waterpipe use: data from cross-  
5 sectional online surveys in 2012 and 2013. *Nicotine Tob Res* 2014;16(7): 931–938.  
6  
7 doi:10.1093/ntr/ntu015.  
8  
9
- 10 10. Maziak W, Nakkash R, Bahelah R, et al. Tobacco in the Arab world: old and new epidemics  
11 amidst policy paralysis. *Health Policy Plan* 2013;29:784–94.  
12  
13 doi.org/10.1136/tobaccocontrol-2014-051903.  
14  
15
- 16 11. Mostafa A, El Houssinie M, Aboul Foutouh A. Multiple Tobacco Use among Young Adult  
17 Waterpipe Smokers in Egypt. *East Mediterr Health J* 2018;24(x):xxx–xxx. [https://](https://doi.org/2018.24.2.XX)  
18  
19 doi.org/2018.24.2.XX. In press.  
20  
21
- 22 12. Jawad M, Lee JT, Millett C. Waterpipe Tobacco Smoking Prevalence and Correlates in 25  
23 Eastern Mediterranean and Eastern European Countries: Cross-Sectional Analysis of the  
24  
25 Global Youth Tobacco Survey. *Nicotine Tob Res* 2016;18(4):395-402.  
26  
27 doi:10.1093/ntr/ntv101.  
28  
29
- 30 13. El Awa F, Fouad H, El Naga RA, et al. Prevalence of tobacco use among adult and  
31  
32 adolescent females in Egypt. *East Mediterr Health J* 2013;19(8):749–54. PMID:24975361.  
33  
34
- 35 14. Shisha and smokeless tobacco use among university students in Egypt: prevalence,  
36  
37 determinants, and economic aspect. A joint report by the Egyptian Ministry of Health and  
38  
39 Population and the World Health Organization 2014.  
40  
41  
42 [http://applications.emro.who.int/dsaf/EMROPUB\\_2014\\_EN\\_1752.pdf?ua=1&ua=1](http://applications.emro.who.int/dsaf/EMROPUB_2014_EN_1752.pdf?ua=1&ua=1)  
43  
44 (accessed May 2017).  
45  
46
- 47 15. World Health Organization: Global Adult Tobacco Survey: Egypt Country Report 2009.  
48  
49  
50  
51 [http://www.who.int/tobacco/surveillance/gats\\_rep\\_egypt.pdf](http://www.who.int/tobacco/surveillance/gats_rep_egypt.pdf) (accessed September 2017).  
52  
53  
54  
55  
56  
57

- 1  
2  
3 16. World Health Organization Framework Convention on Tobacco Control: Control and  
4 prevention of waterpipe tobacco products (document FCTC/COP/7/10). In: Conference of  
5 the parties to the WHO framework convention on tobacco control, seventh session, Delhi,  
6 India, 7-12 November 2016. World Health Organization, Geneva.  
7  
8 [http://www.who.int/fctc/cop/cop7/FCTC\\_COP\\_7\\_10\\_EN.pdf](http://www.who.int/fctc/cop/cop7/FCTC_COP_7_10_EN.pdf) (accessed May 2017).  
9  
10  
11  
12  
13  
14  
15 17. Jawad M, El Kadi L, Mughrabil S, et al. Waterpipe tobacco smoking legislation and policy  
16 enactment: a global analysis. *Tob Control* 2015;24(1):i60-i65. doi:10.1136/tobaccocontrol-  
17 2014-051911.  
18  
19  
20  
21  
22 18. Salloum RG, Asfar T, Maziak W. Toward a Regulatory Framework for the Waterpipe. *Am J*  
23 *Public Health* 2016;106(10):1773-7. doi:10.2105/AJPH.2016.303322.  
24  
25  
26  
27 19. Hammond D. Health warning messages on tobacco products: a review. *Tob Control*  
28 2011;20(5):327-337. doi.org/10.1136/tc.2010.037630.  
29  
30  
31 20. Noar SM, Hall MG, Francis DB, et al. Pictorial cigarette pack warnings: a meta-analysis of  
32 experimental studies. *Tob Control* 2016;25(3):341-54. doi:10.1136/tobaccocontrol-2014-  
33 051978.  
34  
35  
36  
37  
38 21. Yong HH, Borland R, Thrasher JF, et al. Mediation pathways of the impact of cigarette  
39 warning labels on quit attempts. *Health Psychol* 2014;33(11):1410-20. doi:  
40 10.1037/hea0000056.  
41  
42  
43  
44  
45 22. Emery LF, Romer D, Sheerin KM, Jamieson KH, Peters E. Affective and Cognitive  
46 Mediators of the Impact of Cigarette Warning Labels. *Nicotine Tob Res* 2014;16(3):263-9.  
47 doi.org/10.1093/ntr/ntt124.  
48  
49  
50  
51  
52  
53  
54  
55  
56  
57  
58  
59  
60

- 1  
2  
3 23. IARC Handbooks of Cancer Prevention, Tobacco Control. Methods for Evaluating Tobacco  
4 Control Policies 2008; 12. Lyon, France. [http://www.iarc.fr/en/publications/pdfs-](http://www.iarc.fr/en/publications/pdfs-online/prev/handbook12/Tobacco_vol12.pdf)  
5 [online/prev/handbook12/Tobacco\\_vol12.pdf](http://www.iarc.fr/en/publications/pdfs-online/prev/handbook12/Tobacco_vol12.pdf) (accessed April, 2015).  
6  
7  
8  
9  
10 24. World Health Organization. Guidelines for implementation of Article 11 of the WHO  
11 Framework Convention on Tobacco Control (Packaging and labelling of tobacco products)  
12 2008. [http://www.who.int/fctc/guidelines/article\\_11.pdf?ua=1](http://www.who.int/fctc/guidelines/article_11.pdf?ua=1) (accessed April, 2015).  
13  
14  
15  
16  
17 25. Mostafa A, Kashiwabara M. Tobacco packaging and labelling policies in countries of the  
18 Eastern Mediterranean and Western Pacific Regions: Post-deadline assessment of the time-  
19 bound measures of WHO FCTC Article 11. *Tobacco Prevention & Cessation*  
20 2016;2(November):78. doi:10.18332/tpc/66793.  
21  
22  
23  
24  
25  
26 26. World Health Organization: Tobacco control country profiles 2017. Egypt.  
27 [http://www.who.int/tobacco/surveillance/policy/country\\_profile/egy.pdf?ua=1](http://www.who.int/tobacco/surveillance/policy/country_profile/egy.pdf?ua=1) (accessed 15  
28 December 2017).  
29  
30  
31  
32  
33 27. Stead M, Moodie C, Angus K, et al. Is Consumer Response to Plain/Standardised Tobacco  
34 Packaging Consistent with Framework Convention on Tobacco Control Guidelines? A  
35 Systematic Review of Quantitative Studies. *PLoS ONE* 2013;8(10): e75919.  
36  
37  
38  
39  
40  
41  
42  
43 28. Wakefield M, Coomber K, Zacher M, et al. Australian adult smokers' responses to plain  
44 packaging with larger graphic health warnings 1 year after implementation: results from a  
45 national cross-sectional tracking survey. *Tob Control* 2015;24(2):ii17–ii25.  
46  
47  
48  
49  
50  
51  
52 29. Durkin S, Brennan E, Coomber K, et al. Short-term changes in quitting-related cognitions  
53 and behaviours after the implementation of plain packaging with larger health warnings:  
54  
55  
56  
57  
58  
59  
60

- 1  
2  
3 findings from a national cohort study with Australian adult smokers. *Tob*  
4  
5 *Control* 2015;24:ii26-ii32. doi:10.1136/tobaccocontrol-2014-052058.  
6  
7  
8 30. Mays D, Niaura RS, Evans WD, et al. Cigarette packaging and health warnings: the impact  
9  
10 of plain packaging and message framing on young smokers. *Tob Control* 2015;24(e1):e87-  
11  
12 92. doi: 10.1136/tobaccocontrol-2013-051234.  
13  
14  
15 31. Munafo MR, Roberts N, Bauld L, et al.: Plain packaging increases visual attention to health  
16  
17 warnings on cigarette packs in non-smokers and weekly smokers but not daily smokers.  
18  
19 *Addiction* 2011;106(8):1505-10. doi:10.1111/j.1360-0443.2011.03430.x  
20  
21  
22 32. Ross JC, Noar SM, Sutfin EL: Systematic Review of Health Communication for Non-  
23  
24 Cigarette Tobacco Products. *Health Communication* 2017;  
25  
26 doi:10.1080/10410236.2017.1407274.  
27  
28  
29 33. Mohammed H T. The efficacy of viewing health warnings on shisha smoking among shisha  
30  
31 smokers.  
32  
33 [https://uwspace.uwaterloo.ca/bitstream/handle/10012/7419/Mohammed\\_HebaTallah.pdf?seq](https://uwspace.uwaterloo.ca/bitstream/handle/10012/7419/Mohammed_HebaTallah.pdf?sequence=1)  
34  
35 [uence=1](https://uwspace.uwaterloo.ca/bitstream/handle/10012/7419/Mohammed_HebaTallah.pdf?sequence=1) (accessed September, 2017).  
36  
37  
38 34. Islam F, Salloum RG, Nakkash R, et al.: Effectiveness of health warnings for waterpipe  
39  
40 tobacco smoking among college students. *Int J Public Health* 2016;61(6):709-715. doi:  
41  
42 10.1007/s00038-016-0805-0.  
43  
44  
45 35. Jawad M, Bakir A, Ali M, et al.: Impact of Waterpipe Tobacco Pack Health Warnings on  
46  
47 Waterpipe Smoking Attitudes: A Qualitative Analysis among Regular Users in London.  
48  
49 *BioMed Res Int* 2015:745865.doi: 10.1155/2015/745865.  
50  
51  
52 36. Salloum RG, Abu-Rmeileh N, Hamadeh R, et al.: Policy-Relevant Context of Waterpipe  
53  
54 Tobacco Smoking among University Students in Six Countries Across the Eastern  
55  
56  
57  
58  
59  
60

- 1  
2  
3 Mediterranean Region: A Qualitative Study. *Asian Pac J Cancer Prev* 2017;18(9): 2533-  
4 2540. doi:10.22034/APJCP.2017.18.9.2533.  
5  
6  
7  
8 37. Mostafa A, Mohammed HT. Graphic health warnings and their best position on waterpipes:  
9 A cross-sectional survey of expert and public opinion. *Tobacco Prevention & Cessation*  
10 2017; 3(June):116. doi: [10.18332/tpc/70873](https://doi.org/10.18332/tpc/70873).  
11  
12  
13  
14 38. Jones R: Why do qualitative research? *BMJ* 1995; 311(6996):2. PMID: PMC2550075.  
15  
16  
17 39. Pope K, Mays R: Qualitative research: Reaching the parts other methods cannot reach: An  
18 introduction to qualitative methods in health and health services research. *BMJ* 1995; 311  
19 (6996):42-5. PMID: PMC2550091.  
20  
21  
22  
23 40. Ajzen I. The theory of planned behavior. *Organ Behav Hum Decis Process* 1991;50(2):179-  
24 211. [https://doi.org/10.1016/0749-5978\(91\)90020-T](https://doi.org/10.1016/0749-5978(91)90020-T).  
25  
26  
27  
28 41. O'Brien BC, Harris IB, Beckman TJ, et al. Standards for reporting qualitative research: a  
29 synthesis of recommendations. *Acad Med* 2014;89(9):1245-1251.  
30  
31  
32  
33 42. Feldman MS, Bell J, Berger MT. *Gaining Access: A Practical and Theoretical Guide for*  
34 *Qualitative Researchers*, Altamira Press 2003, Oxford, UK.  
35  
36  
37  
38 43. World Health Organization Framework Convention on Tobacco Control. Health Warnings  
39 Database: <http://www.who.int/tobacco/healthwarningsdatabase/en/> (accessed April 2015).  
40  
41  
42  
43 44. World Health Organization. Evidence, Design and Implementation of Plain Packaging at:  
44 [http://apps.who.int/iris/bitstream/10665/207478/1/9789241565226\\_eng.pdf?ua=1](http://apps.who.int/iris/bitstream/10665/207478/1/9789241565226_eng.pdf?ua=1) (accessed  
45 December 2016).  
46  
47  
48  
49 45. Akl EA, Gaddam S, Gunukula SK, et al. The effects of waterpipe tobacco smoking on health  
50 outcomes: A systematic review. *Int J Epidemiol* 2010;39:834-857. doi:10.1093/ije/ dyq002.  
51  
52  
53  
54  
55  
56  
57  
58  
59  
60

- 1  
2  
3 46. Walker JL. Research column. The use of saturation in qualitative research. *Can J Cardiovasc*  
4  
5 *Nurs* 2012;22:37-46. PMID: 22803288.  
6  
7  
8 47. Braun V, Clarke V. Using thematic analysis in psychology. *Qualitative Research in*  
9  
10 *Psychology* 2006; 3(2,): 77–101. doi:10.1191/1478088706qp063oa.  
11  
12 48. Pope C, Ziebland S, Mays N: Qualitative research in health care: Analysing qualitative data.  
13  
14 *BMJ* 2000;320(7227):114–116. PMCID: PMC1117368  
15  
16  
17 49. Boyatzis RE: Transforming qualitative information: thematic analysis and code development  
18  
19 California: Sage Publications; 1998.  
20  
21  
22 50. White V, Bariola E, Faulkner A, et al. Graphic Health Warnings on Cigarette Packs: How  
23  
24 Long Before the Effects on Adolescents Wear Out? *Nicotine Tob Res* 2015;17(7):776-83.  
25  
26 doi:10.1093/ntr/ntu184.  
27  
28  
29 51. Robert ME, Peters E, Ferketich AK, et al. The Age-related Positivity Effect and  
30  
31 Tobacco Warning Labels. *Tob Regul Sci* 2016;2(2):176-185. doi:10.18001/TRS.2.2.8.  
32  
33  
34 52. McNeill A, Gravely S, Hitchman SC, et al. Tobacco packaging design for reducing tobacco  
35  
36 use. *Cochrane Database of Systematic Reviews* 2017, Issue 4. Art. No.: CD011244.  
37  
38 doi:10.1002/14651858.CD011244.pub2.  
39  
40  
41 53. Peters GJ, Ruiters RA, Kok G. Threatening communication: A critical re-analysis and a  
42  
43 revised meta-analytic test of fear appeal theory. *Health Psychology Review* 2013;7(1):S8–  
44  
45 S31. doi:10.1080/17437199.2012.703527.  
46  
47  
48 54. Thrasher J, Swayampakala K, Borland R, et al. Influences of Self-Efficacy, Response  
49  
50 Efficacy, and Reactance on Responses to Cigarette Health Warnings: A Longitudinal Study  
51  
52 of Adult Smokers in Australia and Canada. *Health Commun* 2016;31(12):1517-1526.  
53  
54 doi:10.1080/10410236.2015.1089456.  
55  
56  
57  
58  
59  
60

- 1  
2  
3 55. Droulers O, Gallopel-Morvan K, Lacoste-Badie S, et al. The influence of threatening visual  
4 warnings on tobacco packaging: Measuring the impact of threat level, image size, and type of  
5 pack through psychophysiological and self-report methods. *PLoS One* 2017;12(9):e0184415.  
6 doi:10.1371/journal.pone.0184415.  
7  
8  
9  
10  
11  
12 56. Hoek J, Hoek-Sims A, Gendall P. A qualitative exploration of young adult smokers'  
13 responses to novel tobacco warnings. *BMC Public Health* 2013;13:609. doi: 10.1186/1471-  
14 2458-13-609.  
15  
16  
17  
18  
19 57. Jaber R, Madhivanan P, Khader Y, et al. Predictors of waterpipe smoking progression among  
20 youth in Irbid, Jordan: A longitudinal study (2008-2011). *Drug Alcohol*  
21 *Depend* 2015;153:265-70. doi:10.1016/j.drugalcdep.2015.05.008.  
22  
23  
24  
25  
26 58. Koval J, Aubut J, Pederson L, et al. The Potential Effectiveness of Warning Labels on  
27 Cigarette Packages. The Perceptions of Young Adult Canadians. *Can J Public Health* 2005;  
28 96(5):354. doi:10.1016/j.drugalcdep.2015.05.008.  
29  
30  
31  
32  
33 59. Singh A, Owusu-Dabo E, Britton J, et al. "Pictures don't lie, seeing is believing": exploring  
34 attitudes to the introduction of pictorial warnings on cigarette packs in Ghana. *Nicotine Tob*  
35 *Res* 2014;16(12):1613-9. doi:10.1093/ntr/ntu127.  
36  
37  
38  
39  
40 60. Thrasher J, Swayampakala K, Cummings M, et al. Cigarette package inserts can promote  
41 efficacy beliefs and sustained smoking cessation attempts: A longitudinal assessment of an  
42 innovative policy in Canada. *Preventive Medicine* 2016; 88:59–65.  
43  
44  
45  
46  
47  
48  
49 61. Rising J, Alexander L. Marketing of menthol cigarettes and consumer perceptions. *Tob Induc*  
50 *Dis* 2011;9(1): S2. doi:10.1186/1617-9625-9-S1-S2.  
51  
52  
53  
54 62. Hammond D, Parkinson C. The impact of cigarette package design on perceptions of risk.  
55  
56  
57



1  
2  
3  
4  
5  
6  
7  
8  
9  
10  
11  
12  
13  
14  
15  
16  
17  
18  
19  
20  
21  
22  
23  
24  
25  
26  
27  
28  
29  
30  
31  
32  
33  
34  
35  
36  
37  
38  
39  
40  
41  
42  
43  
44  
45  
46  
47  
48  
49  
50  
51  
52  
53  
54  
55  
56  
57  
58  
59  
60

*Journal of Public Health* 2009;31(3):345-53. doi:10.1093/pubmed/fdp066.

For peer review only

1  
2  
3 **Figure 1. Pictorial Health Warnings used in this study**  
4  
5  
6  
7  
8  
9  
10  
11  
12  
13  
14  
15  
16  
17  
18  
19  
20  
21  
22  
23  
24  
25  
26  
27  
28  
29  
30  
31  
32  
33  
34  
35  
36  
37  
38  
39  
40  
41  
42  
43  
44  
45  
46  
47  
48  
49  
50  
51  
52  
53  
54  
55  
56  
57  
58  
59  
60

For peer review only

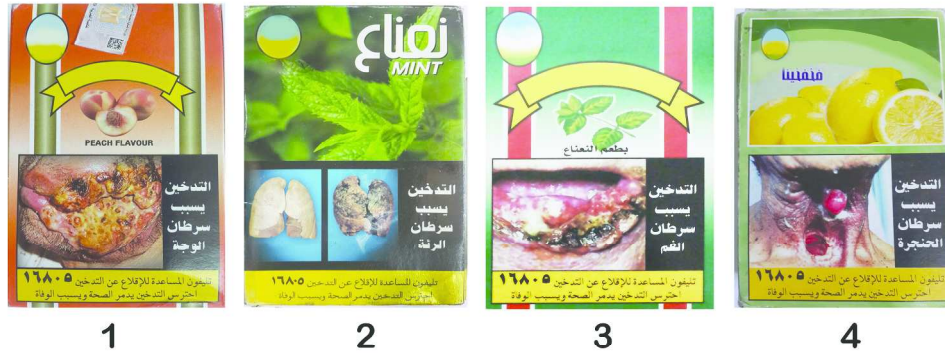

**A. Current PHW set used in the qualitative study**  
 (1)Face cancer, (2) Lung cancer, (3) Mouth cancer, and (4) Throat cancer

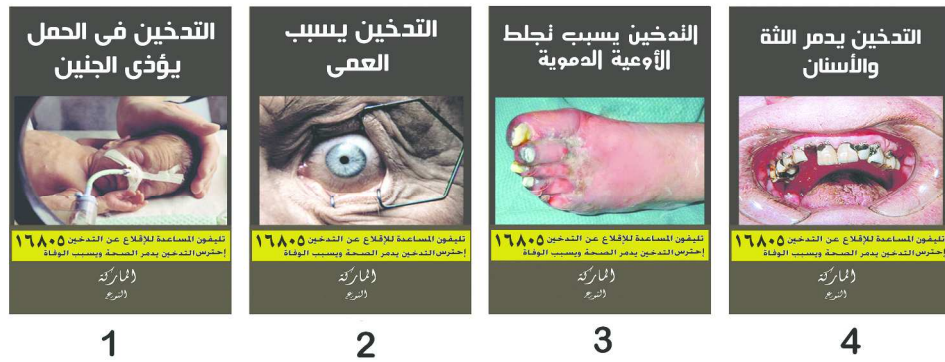

**B. Alternative PHW set used in the qualitative study**  
 (1)Fetal harm, (2) Blindness, (3) Blood vessel clotting, (4) Tooth and gum decay

Figure 1. PHWs used in the study

Figure 1. Pictorial Health Warnings used in this study

297x300mm (300 x 300 DPI)

## Supplementary

**Table 1. Total number of interviews and focus group discussions conducted by demographic profile of participants**

|       | FGDs (10, total participants=80) |     |             |     | IDIs (10) |     |             |     |
|-------|----------------------------------|-----|-------------|-----|-----------|-----|-------------|-----|
|       | Males (7)                        |     | Females (3) |     | Males (7) |     | Females (3) |     |
| Age   | S                                | NS  | S           | NS  | S         | NS  | S           | NS  |
|       | (5)                              | (2) | (2)         | (1) | (6)       | (1) | (2)         | (1) |
| 18-24 | 2                                | 1   | 1           |     | 3         | 1   | 1           |     |
| 25+   | 3                                | 1   | 1           | 1   | 3         |     | 1           | 1   |

FGDs=Focus group discussions, IDIs=In-depth interviews, S=Waterpipe smoker, NS=Non-smoker

**Table 2. Sociodemographic characteristics and waterpipe smoking status of participants**

|                                        | N=90        | %    |
|----------------------------------------|-------------|------|
| <b>Gender</b>                          |             |      |
| Male                                   | 65          | 72.2 |
| Female                                 | 25          | 27.8 |
| <b>Age (range 18-73)</b>               |             |      |
| <b>Mean age ± standard deviation</b>   | 33.4 ± 11.6 |      |
| <b>Age group, years</b>                |             |      |
| 18-24                                  | 21          | 23.3 |
| 25+                                    | 69          | 76.7 |
| <b>Education level</b>                 |             |      |
| Primary or lower                       | 16          | 17.7 |
| Secondary                              | 32          | 35.6 |
| Tertiary                               | 42          | 46.7 |
| <b>Occupation</b>                      |             |      |
| Employed professional                  | 42          | 46.7 |
| Employed non-professional              | 34          | 37.8 |
| In further study or seeking employment | 14          | 15.5 |
| <b>Residence</b>                       |             |      |
| Rural                                  | 20          | 22.2 |
| Semi-urban                             | 51          | 56.7 |
| Urban                                  | 19          | 21.2 |
| <b>Smoking status</b>                  |             |      |
| Waterpipe smoker                       | 62          | 68.9 |
| Non-smoker                             | 28          | 31.1 |
| <b>Ever noticed PHWs on WTPs</b>       |             |      |
| Yes                                    | 53          | 58.9 |
| <b>Where</b>                           |             |      |
| At cafés                               | 17          | 32.1 |
| At home                                | 11          | 20.8 |
| Buying tobacco                         | 25          | 47.2 |

**Interview guide \***

| <b>Interview guide questions</b>                                                                                                                                                                                                                                                                                                                                                                                                               | <b>Parts relevant to this article</b> |
|------------------------------------------------------------------------------------------------------------------------------------------------------------------------------------------------------------------------------------------------------------------------------------------------------------------------------------------------------------------------------------------------------------------------------------------------|---------------------------------------|
| <p><b>Introductory questions</b></p> <p><i>In general, what do you think of waterpipe smoking?</i></p> <p><b>Personal experiences of waterpipe smoking</b></p> <p><i>Tell me about your waterpipe smoking, habits, duration, etc...Tell us more on how did you start smoking?</i></p> <p><i>Could you describe the setting in which you smoked waterpipe last time?</i></p>                                                                    |                                       |
| <p><b>Awareness of pictorial health warnings</b></p> <p><i>Have you ever noticed the pictorial health warnings on waterpipe tobacco packs?</i></p> <p><i>Where did you see them? Can you tell us more about the setting?</i></p> <p><i>How do they look like?</i></p>                                                                                                                                                                          | √                                     |
| <p><b>Positive and negative characteristics of the current/alternative set of PHW</b></p> <p><i>Have you ever come across the warning on this pack before? What is your first impression about it?</i></p> <p><i>What do you think/feel when you see it?</i></p> <p><i>In your opinion, what is good and is bad about it? Why do you think so?</i></p> <p><i>Do you think it is/would be effective? Why and how do you think so?</i></p>       | √                                     |
| <p><b>Reactions to placing PHW on the waterpipe device</b></p> <p><i>What is your first impression about putting the warning in this spot?</i></p> <p><i>What do you think/feel when you see there?</i></p> <p><i>In your opinion, what is good and is bad about this spot? Why do you think so?</i></p> <p><i>Do you think people will notice the PHW on this spot?</i></p> <p><i>Would it be effective? Why and how do you think so?</i></p> |                                       |

**\*This guide contains core questions. Probing questions were used when necessary (examples include questions on salience, affective reactions, perceived harm, credibility)**

**Table 3. Themes and subthemes identified from focus groups and in-depth interviews\***

| Themes                                                                            | Subthemes                                                                                                                                                                                                                                                                                             | Themes covered in this article |
|-----------------------------------------------------------------------------------|-------------------------------------------------------------------------------------------------------------------------------------------------------------------------------------------------------------------------------------------------------------------------------------------------------|--------------------------------|
| General perceptions of waterpipe smoking                                          | Factors contributing to WTS<br>Factors affecting WTS initiation and continuation<br>WTS setting<br>Patterns of WTS consumption<br>Social and cultural context of WTS<br>WTS compared to cigarette smoking<br>Tobacco product characteristics<br>Perceived health consequences<br>Reasons for quitting |                                |
| Views on pictorial health warning labels on waterpipe tobacco packs               | General knowledge /awareness of PHWs on WTPs<br>Sources of awareness<br>Most salient/recalled labels, reasons<br>Cessation helpline<br>Perception of PHWs on WTPs motivating and discouraging factors related to viewing PHW labels                                                                   | Partly                         |
| Perceptions of existing waterpipe tobacco warnings                                | General impressions, attitude (appeal, affective reactions, avoidance, wear out)<br>Positive and negative characteristics of design and content<br>Participants views of the most effective one in general<br>Possible effects on quitting and/or initiating WTS                                      | √                              |
| Insights into novel waterpipe tobacco warnings                                    | General impressions, attitude (appeal, affective reactions, avoidance)<br>Positive and negative characteristics of design and content<br>Participants views of the most effective one in general<br>Possible effects on quitting and/or initiating WTS                                                | √                              |
| Avenues for development                                                           | Participant suggestions of improved label characteristics regarding content, design, location<br>Participant suggestions for other placement locations                                                                                                                                                | Partly                         |
| Best location for inserting labels on the waterpipe device and accessories        | Views behind choosing each location<br>Concerns about each location<br>Possible effects on quitting and/or initiating WTS                                                                                                                                                                             |                                |
| Participant suggestions for reducing tobacco use in general and WTS in particular | Further strategies for improved regulations<br>Enforcing existing laws<br>Posting warnings in public and other places<br>Associate warnings with mass-media anti-tobacco campaigns, increase taxation and other suggestions                                                                           |                                |

**\* Themes presented in this article were synthesized in respect to warning content and pack design and their perceived likely effect on uptake or cessation of waterpipe smoking, comparing existing versus novel warnings.**

**Table 4. Selected participants' quotes representing views of the current and alternative pictorial health warning labels on waterpipe packs. Quotes are presented by gender, age group\*, smoking status, and region of participants**

| <i>Warning label content – perceived likely effect of existing and novel PHWs</i>                                                                                               |                                                 |
|---------------------------------------------------------------------------------------------------------------------------------------------------------------------------------|-------------------------------------------------|
| "The picture of a bent cigarette (i.e. representing sexual dysfunction) caught people's attention considerably...but the other warning...people got used to them after a while" | <i>(Male smoker, &gt;25y, rural)</i>            |
| "The most commonly known warning is that of the lungs"                                                                                                                          | <i>(Male smoker, &gt;25y, semi-urban)</i>       |
| "The picture is disgusting and frightening..."                                                                                                                                  | <i>(Male non-smoker, &lt;25y, rural)</i>        |
| "Pictures are scary and unpleasant"                                                                                                                                             | <i>(Male smoker, &gt;25y, semi-urban)</i>       |
| "The pictures make me sick..."                                                                                                                                                  | <i>(Male smoker, &gt;25y, urban)</i>            |
| "The warning shouldn't be that it causes cancer and that's it...that is just routine talk"                                                                                      | <i>(Male non-smoker, &gt;25y, urban)</i>        |
| "I just don't believe it...nobody reaches this stage"                                                                                                                           | <i>(Female smoker, &lt;25y, urban)</i>          |
| "I don't believe the warnings...I know smoking is harmful but not to that extent. This is unrealistic"                                                                          | <i>(Male smoker, &lt;25y, rural)</i>            |
| "We want to see the normal lung beside the diseased one...but this one straight is not clear"                                                                                   | <i>(Male non-smoker, &gt;25y, urban)</i>        |
| "The pictures are not realistic, we never see such things in real life"                                                                                                         | <i>(Male non-smoker, &gt;25y, semi-urban)</i>   |
| "The pictures are extremely exaggerated"                                                                                                                                        | <i>(Male smoker, &lt;25y, urban)</i>            |
| "Is this a burnt piece of pizza? (face cancer warning)...this one won't be clear to illiterates...I didn't get it before reading the text beneath"                              | <i>(Male non-smoker, &gt;25y, urban)</i>        |
| "The picture is frightening and is very disgusting"                                                                                                                             | <i>(Male smoker, &gt;25y, urban)</i>            |
| "It can make me want to look closely to see what the illness shown is"                                                                                                          | <i>(Female non-smoker, &gt;25y, semi-urban)</i> |
| "For me, the most effective one is picture of teeth affection...it's very scary and upsetting. I see that content of the warning is much more important than size"              | <i>(Male smoker, &gt;25y, semi-urban)</i>       |
| "With this shape (deformed teeth and gums) I may disturb my son when I come close to kiss him...now that will hurt me"                                                          | <i>(Male smoker, &gt;25y, semi-urban)</i>       |
| "The baby's picture may affect women more than me"                                                                                                                              | <i>(Male smoker, &gt;25y, semi-urban)</i>       |
| "If a pregnant woman saw this picture...she would fear for her unborn child to have anomalies"                                                                                  | <i>(Female smoker, &gt;25y, semi-urban)</i>     |
| "Explain the components of tobacco as glycerin and the hazards of each of them...tell them: try to smoke each component by itself and see what happens to you"                  | <i>(Male non-smoker, &gt;25y, semi-urban)</i>   |
| "Simplify the matter of quitting to people...especially those who have been smoking for a long time..."                                                                         | <i>(Male nonsmoker, &gt;25 y, rural)</i>        |
| "If you talk to a smoker about their health...they wouldn't pay attention but there are other aspects as hazards to their children"                                             | <i>(Male non-smoker, &gt;25y, semi-urban)</i>   |
| "The most effective thing that makes a smoker quit is that they themselves get ill or they see someone get ill"                                                                 | <i>(Male smoker, &gt;25y, semi-urban)</i>       |
| "I saw on the internet a pack of cigarettes with a picture of a mother and her child, and on opening it the mother is separated from him. This a new effective idea."           | <i>(Female smoker, &lt;25 y, urban)</i>         |



1  
2  
3  
4  
5  
6  
7  
8  
9  
10  
11  
12  
13  
14  
15  
16  
17  
18  
19  
20  
21  
22  
23  
24  
25  
26  
27  
28  
29  
30  
31  
32  
33  
34  
35  
36  
37  
38  
39  
40  
41  
42  
43  
44  
45  
46  
47  
48  
49  
50  
51  
52  
53  
54  
55  
56  
57  
58  
59  
60

|                                                                                                                                                                                                                                   |                                        |
|-----------------------------------------------------------------------------------------------------------------------------------------------------------------------------------------------------------------------------------|----------------------------------------|
| "A pregnant woman or a mother may ask their smoker husband to stop"                                                                                                                                                               | (Female non-smoker, >25y, semi-urban)  |
| "The only thing that can force me to stop smoking, even if I'm a heavy smoker is the baby affection"                                                                                                                              | (Female smoker, <25 y, urban)          |
| "Warnings should target young people under 17 before they attempt smoking"                                                                                                                                                        | (Male non-smoker, >25y, semi-urban)    |
| "Warnings concerning sexual dysfunction can affect young smokers"                                                                                                                                                                 | (Male non-smoker, >25y, semi-urban)    |
| "Focus on the damage that the family suffers...there are problems that can occur with the wife because of smoking...so smoking may endanger the family bonds"                                                                     | (Male smoker, >25y, semi-urban)        |
| "Pictures should be more realistic, and not only focus on severe side effects like cancers... like if warnings demonstrate just a fingernail affected due to smoking not all the hand, people will be more tempted to believe it" | (Male smoker, <25 year, rural)         |
| <b>Design Features of WTPs – perceived likely effect of existing and novel PHWs</b>                                                                                                                                               |                                        |
| "The apples got my attention"                                                                                                                                                                                                     | (Female smoker, >25y, semi-urban)      |
| "After seeing this...(pointing to the fruit depicted on the pack)...it will be hard for me to link the idea with the damage in this picture"                                                                                      | (Male non-smoker, <25y, rural)         |
| "Pictures of fruits are attractive and appetizing"                                                                                                                                                                                | (Male smoker, >25y, semi-urban)        |
| "If there is no flavored tobacco, I will quit"                                                                                                                                                                                    | (Male smoker, <25y, urban)             |
| "I can't see any flavors on it...I want to hold it closely to know what did they put there instead...if shisha is served as it is...without any flavors?!...I'll quit"                                                            | (Male smoker, <25y, urban)             |
| "If flavors were banned may be some will quit but warnings have no effect"                                                                                                                                                        | (Male smoker, <25y, urban)             |
| "The pictures of fruits must be removed as they are appetizing"                                                                                                                                                                   | (Male non-smoker, <2, rural)           |
| "The dark background makes the writings clearer"                                                                                                                                                                                  | (Male non-smoker, >25y, semi-urban)    |
| "The alternative pack is clearer regarding the color, the picture and the way of writing"                                                                                                                                         | (Male non-smoker, < 25 y, rural)       |
| "The black color makes the pack a lot chic"                                                                                                                                                                                       | (Male smoker, <25y, urban)             |
| "The color of the package is dark and it conveys a sense of pessimism"                                                                                                                                                            | (Male smoker, >25y, rural)             |
| "The bigger the picture, the better"                                                                                                                                                                                              | (Male smoker, <25y, semi-urban)        |
| "The warning should be put on top because the pictures of fruits are drawing attention away from the warning"                                                                                                                     | (Female non-smoker, >25y, semi-urban)  |
| "Oh! I didn't realize there was a quit line on the pack before...this dark background made some kind of contrast... the text now is way clearer for me to read"                                                                   | (Female smoker, <25y, urban)           |
| "I used to think about the hazards a lot when the pictures first appeared...then I got used to them...I don't pay them attention anymore"                                                                                         | (Male smoker, <25y, semi-urban)        |
| "I have seen the warnings too often that they no longer frighten me"                                                                                                                                                              | (Male smoker, <25y, rural)             |
| "The pictures are horrible but people got used to them, if a nonsmoker wished to try and saw the warnings they may change their mind but for those who are already smokers, the warnings make no difference"                      | " (Male non-smoker, >25y, semi-urban)  |
| "Warnings influence the non-smokers much more than smokers, as non-smokers usually find the picture more disgusting"                                                                                                              | (Female, non-smoker, >25y, semi-urban) |

|                                                                                                                                                         |                                                  |
|---------------------------------------------------------------------------------------------------------------------------------------------------------|--------------------------------------------------|
| "I avoid buying the picture of the tongue in particular (referring to the mouth cancer warning)"                                                        | <i>(Male smoker, &lt;25y, semi-urban)</i>        |
| "People can go around all day looking for a certain picture (the lungs)"                                                                                | <i>(Male smoker, &gt;25y, rural)</i>             |
| "Vendors used to sell the pack with free stickers to cover the warnings"                                                                                | <i>(Male smoker, &gt;25y, semi-urban)</i>        |
| "No one would buy a pack with such warning (means warning picturing effect of smoking on children)"                                                     | <i>(Female smoker, &gt;25y, semi-urban)</i>      |
| "If the warning on the pack looks bad, we tend to throw the external package away and put tobacco in another package or may be order a certain warning" | <i>(Male smoker, &gt;25y, rural)</i>             |
| "The alternative pack may make some smokers reduce smoking"                                                                                             | <i>(Male non-smoker, &lt;25y, rural)</i>         |
| "A beginner can be affected compared to a person who has been smoking for 15 years and nothing happened to them as a result of smoking"                 | <i>(Male non-smoker, &lt;25y, rural)</i>         |
| "Non-smokers will be more affected by it, smokers won't be much affected"                                                                               | <i>(Female, non-smoker, &gt;25y, semi-urban)</i> |
| "It could affect those who want to start smoking, but the older smokers won't be affected much"                                                         | <i>(Male, smoker, &lt;25y, semi-urban)</i>       |

**\*The age group of participants was categorized as > or < 25 years, because we were interested in highlighting the views of young adults who may be at higher risk of experiencing WTS or maybe non-established WT users yet, versus older adults who might more likely have established a smoking or non-smoking behaviour.**

### ***Discussion-Strengths and Limitations***

To our knowledge, this is the first qualitative study to assess smokers' and non-smokers' awareness and acceptance of currently used and novel WT PHWs with plain packaging. Our novel warnings simulated how PHWs appear (or could appear) on packs and devices, we explored projected rather than real-life responses. Experimental work could estimate the likely impact of our new label designs, including more targeted PHWs, on waterpipe smokers' risk perceptions, attitudes and likely cessation responses. Future research could also develop a more comprehensive analysis of factors motivating and reinforcing WTS uptake. Given our findings that PHWs have the potential to reduce WTS initiation, it is also important to test whether the PHW themes we developed could be used in wider health promotion campaigns to reduce the appeal and perceived acceptability of WTS. Future research could explore how WT warnings featuring waterpipe-specific messages would affect awareness and perceptions of WTS.

Our small sample means we cannot generalize our findings, though we note a sample of 90 individuals is still substantial, and saturation had been reached in the responses received. Despite these limitations, our study provides novel insights into the factors supporting WTS uptake, suggests themes PHWs could feature, and outlines how PHWs' format could be improved. We recognize this work programme faces challenges, given the limited resources and capacity in low- and middle-income countries; nonetheless, our findings represent an important step in supporting a comprehensive regulatory framework that reduces WTS and the harm this form of tobacco use causes.

# Reporting checklist for qualitative study.

Based on the SRQR guidelines.

## Instructions to authors

Complete this checklist by entering the page numbers from your manuscript where readers will find each of the items listed below.

Your article may not currently address all the items on the checklist. Please modify your text to include the missing information. If you are certain that an item does not apply, please write "n/a" and provide a short explanation.

Upload your completed checklist as an extra file when you submit to a journal.

In your methods section, say that you used the SRQR reporting guidelines, and cite them as:

O'Brien BC, Harris IB, Beckman TJ, Reed DA, Cook DA. Standards for reporting qualitative research: a synthesis of recommendations. *Acad Med.* 2014;89(9):1245-1251.

|                              | Reporting Item                                                                                                                                                                                                                                          | Page Number |
|------------------------------|---------------------------------------------------------------------------------------------------------------------------------------------------------------------------------------------------------------------------------------------------------|-------------|
|                              | <a href="#">#1</a> Concise description of the nature and topic of the study identifying the study as qualitative or indicating the approach (e.g. ethnography, grounded theory) or data collection methods (e.g. interview, focus group) is recommended | 1,3, 8 & 9  |
|                              | <a href="#">#2</a> Summary of the key elements of the study using the abstract format of the intended publication; typically includes background, purpose, methods, results and conclusions                                                             | 3, 4        |
| Problem formulation          | <a href="#">#3</a> Description and significance of the problem / phenomenon studied: review of relevant theory and empirical work; problem statement                                                                                                    | 3, 5-9      |
| Purpose or research question | <a href="#">#4</a> Purpose of the study and specific objectives or questions                                                                                                                                                                            | 3, 8        |
| Qualitative approach         | <a href="#">#5</a> Qualitative approach (e.g. ethnography,                                                                                                                                                                                              | 8, 9        |

|                                                                                                                         |                                                   |                                                                                                                                                                                                                                                                                                                                                                                                                                                                                                                                                                                                                                        |                                                                                                                                                                                      |
|-------------------------------------------------------------------------------------------------------------------------|---------------------------------------------------|----------------------------------------------------------------------------------------------------------------------------------------------------------------------------------------------------------------------------------------------------------------------------------------------------------------------------------------------------------------------------------------------------------------------------------------------------------------------------------------------------------------------------------------------------------------------------------------------------------------------------------------|--------------------------------------------------------------------------------------------------------------------------------------------------------------------------------------|
| 1<br>2<br>3<br>4<br>5<br>6<br>7<br>8<br>9<br>10<br>11<br>12<br>13<br>14<br>15<br>16<br>17<br>18<br>19<br>20<br>21<br>22 | and research<br>paradigm                          | grounded theory, case study,<br>phenomenology, narrative research) and<br>guiding theory if appropriate; identifying the<br>research paradigm (e.g. postpositivist,<br>constructivist / interpretivist) is also<br>recommended; rationale. The rationale<br>should briefly discuss the justification for<br>choosing that theory, approach, method or<br>technique rather than other options<br>available; the assumptions and limitations<br>implicit in those choices and how those<br>choices influence study conclusions and<br>transferability. As appropriate the rationale<br>for several items might be discussed<br>together. | See 5 and Supplementary<br>file page 8 for more on<br>limitations                                                                                                                    |
| 23<br>24<br>25<br>26<br>27<br>28<br>29<br>30<br>31<br>32<br>33<br>34<br>35<br>36<br>37                                  | Researcher<br>characteristics and<br>reflexivity  | <a href="#">#6</a> Researchers' characteristics that may<br>influence the research, including personal<br>attributes, qualifications / experience,<br>relationship with participants, assumptions<br>and / or presuppositions; potential or actual<br>interaction between researchers'<br>characteristics and the research questions,<br>approach, methods, results and / or<br>transferability                                                                                                                                                                                                                                        | 11, 12 for reflexivity<br><br>Researchers are trained<br>or experienced in<br>qualitative methods. Word<br>count limited detailing<br>qualifications and other<br>items listed here. |
| 38<br>39<br>40                                                                                                          | Context                                           | <a href="#">#7</a> Setting / site and salient contextual factors;<br>rationale                                                                                                                                                                                                                                                                                                                                                                                                                                                                                                                                                         | 8, 9, 11                                                                                                                                                                             |
| 41<br>42<br>43<br>44<br>45<br>46<br>47<br>48                                                                            | Sampling strategy                                 | <a href="#">#8</a> How and why research participants,<br>documents, or events were selected;<br>criteria for deciding when no further<br>sampling was necessary (e.g. sampling<br>saturation); rationale                                                                                                                                                                                                                                                                                                                                                                                                                               | 9, 10, 12                                                                                                                                                                            |
| 49<br>50<br>51<br>52<br>53<br>54<br>55<br>56<br>57                                                                      | Ethical issues<br>pertaining to human<br>subjects | <a href="#">#9</a> Documentation of approval by an<br>appropriate ethics review board and<br>participant consent, or explanation for lack<br>thereof; other confidentiality and data<br>security issues                                                                                                                                                                                                                                                                                                                                                                                                                                | 9, 11                                                                                                                                                                                |
| 58<br>59<br>60                                                                                                          | Data collection                                   | <a href="#">#10</a> Types of data collected; details of data                                                                                                                                                                                                                                                                                                                                                                                                                                                                                                                                                                           | 10, 11                                                                                                                                                                               |

|    |                    |                     |                                               |                  |
|----|--------------------|---------------------|-----------------------------------------------|------------------|
| 1  | methods            |                     | collection procedures including (as           |                  |
| 2  |                    |                     | appropriate) start and stop dates of data     |                  |
| 3  |                    |                     | collection and analysis, iterative process,   |                  |
| 4  |                    |                     | triangulation of sources / methods, and       |                  |
| 5  |                    |                     | modification of procedures in response to     |                  |
| 6  |                    |                     | evolving study findings; rationale            |                  |
| 7  |                    |                     |                                               |                  |
| 8  |                    |                     |                                               |                  |
| 9  |                    |                     |                                               |                  |
| 10 | Data collection    | <a href="#">#11</a> | Description of instruments (e.g. interview    | 10, 11           |
| 11 | instruments and    |                     | guides, questionnaires) and devices (e.g.     |                  |
| 12 | technologies       |                     | audio recorders) used for data collection; if |                  |
| 13 |                    |                     | / how the instruments(s) changed over the     |                  |
| 14 |                    |                     | course of the study                           |                  |
| 15 |                    |                     |                                               |                  |
| 16 |                    |                     |                                               |                  |
| 17 |                    |                     |                                               |                  |
| 18 | Units of study     | <a href="#">#12</a> | Number and relevant characteristics of        | 9, 10            |
| 19 |                    |                     | participants, documents, or events            |                  |
| 20 |                    |                     | included in the study; level of participation |                  |
| 21 |                    |                     | (could be reported in results)                |                  |
| 22 |                    |                     |                                               |                  |
| 23 |                    |                     |                                               |                  |
| 24 |                    |                     |                                               |                  |
| 25 | Data processing    | <a href="#">#13</a> | Methods for processing data prior to and      | 11               |
| 26 |                    |                     | during analysis, including transcription,     |                  |
| 27 |                    |                     | data entry, data management and security,     |                  |
| 28 |                    |                     | verification of data integrity, data coding,  |                  |
| 29 |                    |                     | and anonymisation / deidentification of       |                  |
| 30 |                    |                     | excerpts                                      |                  |
| 31 |                    |                     |                                               |                  |
| 32 |                    |                     |                                               |                  |
| 33 |                    |                     |                                               |                  |
| 34 |                    |                     |                                               |                  |
| 35 | Data analysis      | <a href="#">#14</a> | Process by which inferences, themes, etc.     | 11, 12           |
| 36 |                    |                     | were identified and developed, including      |                  |
| 37 |                    |                     | the researchers involved in data analysis;    |                  |
| 38 |                    |                     | usually references a specific paradigm or     |                  |
| 39 |                    |                     | approach; rationale                           |                  |
| 40 |                    |                     |                                               |                  |
| 41 |                    |                     |                                               |                  |
| 42 |                    |                     |                                               |                  |
| 43 | Techniques to      | <a href="#">#15</a> | Techniques to enhance trustworthiness         | 12               |
| 44 | enhance            |                     | and credibility of data analysis (e.g.        |                  |
| 45 | trustworthiness    |                     | member checking, audit trail, triangulation); |                  |
| 46 |                    |                     | rationale                                     |                  |
| 47 |                    |                     |                                               |                  |
| 48 |                    |                     |                                               |                  |
| 49 |                    |                     |                                               |                  |
| 50 | Syntheses and      | <a href="#">#16</a> | Main findings (e.g. interpretations,          | 12               |
| 51 | interpretation     |                     | inferences, and themes); might include        |                  |
| 52 |                    |                     | development of a theory or model, or          | See 9 for theory |
| 53 |                    |                     | integration with prior research or theory     |                  |
| 54 |                    |                     |                                               |                  |
| 55 |                    |                     |                                               |                  |
| 56 |                    |                     |                                               |                  |
| 57 | Links to empirical | <a href="#">#17</a> | Evidence (e.g. quotes, field notes, text      | 13-17            |
| 58 | data               |                     | excerpts, photographs) to substantiate        |                  |
| 59 |                    |                     |                                               |                  |
| 60 |                    |                     |                                               |                  |

analytic findings

|    |                         |                     |                                                |
|----|-------------------------|---------------------|------------------------------------------------|
| 1  |                         |                     |                                                |
| 2  |                         |                     |                                                |
| 3  | Intergration with prior | <a href="#">#18</a> | Short summary of main findings;                |
| 4  | work, implications,     |                     | explanation of how findings and                |
| 5  | transferability and     |                     | conclusions connect to, support, elaborate     |
| 6  | contribution(s) to the  |                     | on, or challenge conclusions of earlier        |
| 7  | field                   |                     | scholarship; discussion of scope of            |
| 8  |                         |                     | application / generalizability; identification |
| 9  |                         |                     | of unique contributions(s) to scholarship in   |
| 10 |                         |                     | a discipline or field                          |
| 11 |                         |                     |                                                |
| 12 |                         |                     |                                                |
| 13 |                         |                     |                                                |
| 14 |                         |                     |                                                |
| 15 | Limitations             | <a href="#">#19</a> | Trustworthiness and limitations of findings    |
| 16 |                         |                     |                                                |
| 17 |                         |                     |                                                |
| 18 |                         |                     |                                                |
| 19 |                         |                     |                                                |
| 20 |                         |                     |                                                |
| 21 | Conflicts of interest   | <a href="#">#20</a> | Potential sources of influence of perceived    |
| 22 |                         |                     | influence on study conduct and                 |
| 23 |                         |                     | conclusions; how these were managed            |
| 24 |                         |                     |                                                |
| 25 |                         |                     |                                                |
| 26 | Funding                 | <a href="#">#21</a> | Sources of funding and other support; role     |
| 27 |                         |                     | of funders in data collection, interpretation  |
| 28 |                         |                     | and reporting                                  |
| 29 |                         |                     |                                                |
| 30 |                         |                     |                                                |

18-21

See also 3, 5 and  
Supplementary file page 8  
for more on limitations

5 and Supplementary file  
page 8 for more on  
limitations

22

22

The SRQR checklist is distributed with permission of Wolters Kluwer © 2014 by the Association of American Medical Colleges. This checklist can be completed online using

<https://www.goodreports.org/>, a tool made by the [EQUATOR Network](#) in collaboration with [Penelope.ai](#)

# BMJ Open

## Plain Packaging of Waterpipe Tobacco? A Qualitative Analysis Exploring Waterpipe Smokers' and Non-smokers' Responses to Enhanced versus Existing Pictorial Health Warnings in Egypt

|                                 |                                                                                                                                                                                                                                                                                                                                                                                                                                                                                                                                                                                                                                                                                                                                                                                                                                                                |
|---------------------------------|----------------------------------------------------------------------------------------------------------------------------------------------------------------------------------------------------------------------------------------------------------------------------------------------------------------------------------------------------------------------------------------------------------------------------------------------------------------------------------------------------------------------------------------------------------------------------------------------------------------------------------------------------------------------------------------------------------------------------------------------------------------------------------------------------------------------------------------------------------------|
| Journal:                        | <i>BMJ Open</i>                                                                                                                                                                                                                                                                                                                                                                                                                                                                                                                                                                                                                                                                                                                                                                                                                                                |
| Manuscript ID                   | bmjopen-2018-023496.R1                                                                                                                                                                                                                                                                                                                                                                                                                                                                                                                                                                                                                                                                                                                                                                                                                                         |
| Article Type:                   | Research                                                                                                                                                                                                                                                                                                                                                                                                                                                                                                                                                                                                                                                                                                                                                                                                                                                       |
| Date Submitted by the Author:   | 20-Jul-2018                                                                                                                                                                                                                                                                                                                                                                                                                                                                                                                                                                                                                                                                                                                                                                                                                                                    |
| Complete List of Authors:       | Mostafa, Aya; Faculty of Medicine, Ain Shams University, Department of Community, Environmental, and Occupational Medicine<br>Mohammed, Heba Tallah; Faculty of Medicine, Ain Shams University, Department of Community, Environmental, and Occupational Medicine;<br>University of Waterloo, Ontario, School of Pharmacy<br>Mohamed, Wafaa; Faculty of Medicine, Ain Shams University, Department of Community, Environmental, and Occupational Medicine<br>Elhabiby, Mahmoud; Faculty of Medicine, Ain Shams University, Department of Psychiatry Medicine<br>Safwat, Wael; Egyptian Tobacco Control Coalition<br>Labib, Sahar; Tobacco Control Unit, Ministry of Health<br>Aboul Fotouh, Aisha; Faculty of Medicine, Ain Shams University, Department of Community, Environmental, and Occupational Medicine<br>Hoek, Janet; University of Otago, Marketing |
| <b>Primary Subject Heading</b>: | Smoking and tobacco                                                                                                                                                                                                                                                                                                                                                                                                                                                                                                                                                                                                                                                                                                                                                                                                                                            |
| Secondary Subject Heading:      | Public health, Qualitative research, Health policy                                                                                                                                                                                                                                                                                                                                                                                                                                                                                                                                                                                                                                                                                                                                                                                                             |
| Keywords:                       | Plain packaging, Health warnings, Waterpipe tobacco, Uptake, Cessation, QUALITATIVE RESEARCH                                                                                                                                                                                                                                                                                                                                                                                                                                                                                                                                                                                                                                                                                                                                                                   |
|                                 |                                                                                                                                                                                                                                                                                                                                                                                                                                                                                                                                                                                                                                                                                                                                                                                                                                                                |

SCHOLARONE™  
Manuscripts



**RESEARCH ARTICLE****Plain Packaging of Waterpipe Tobacco? A Qualitative Analysis Exploring Waterpipe Smokers' and Non-smokers' Responses to Enhanced versus Existing Pictorial Health Warnings in Egypt**

Aya Mostafa<sup>1</sup>, Heba Tallah Mohammed<sup>1,2</sup>, Wafaa Mohamed Hussein<sup>1</sup>, Mahmoud Elhabiby<sup>3</sup>,  
Wael Safwat<sup>4,5</sup>, Sahar Labib<sup>6</sup>, Aisha Aboul Fotouh<sup>1</sup>, Janet Hoek<sup>7</sup>

<sup>1</sup> Department of Community, Environmental, and Occupational Medicine, Faculty of Medicine, Ain Shams University, Cairo, Egypt

<sup>2</sup> School of Pharmacy, University of Waterloo, Ontario, Canada

<sup>3</sup> Department of Psychiatry Medicine, Faculty of Medicine, Ain Shams University, Cairo, Egypt

<sup>4</sup> Egyptian Tobacco Control Coalition, Cairo, Egypt

<sup>5</sup> Egypt Health Foundation, Cairo, Egypt

<sup>6</sup> Tobacco Control Unit, Ministry of Health, Cairo, Egypt

<sup>7</sup> Departments of Public Health and Marketing, University of Otago, New Zealand

**CORRESPONDING AUTHOR**

Dr. Aya Mostafa (ORCID: <http://orcid.org/0000-0002-2803-2608>; Scopus ID: 36010130700)

Department of Community, Environmental, and Occupational Medicine, Faculty of Medicine,

Ain Shams University, Abbasia Square, Cairo, Egypt, PO-box 11566 Cairo, Egypt

E-mail: [aya.kamaleldin@med.asu.edu.eg](mailto:aya.kamaleldin@med.asu.edu.eg) Phone: +2 0100 5217379

**WORD COUNT** Abstract 285, Main text 4,307 (Introduction 773, Methods 1275, Results 1381, Discussion 878).

This manuscript has not been published in another journal, nor is it under review elsewhere.

**ABBREVIATIONS**

**FCTC** — Framework Convention on Tobacco Control

**PHWs** — Pictorial Health Warnings

**WHO** — World Health Organization

**WT** — Waterpipe Tobacco

**WTS** — Waterpipe Tobacco Smoking

**WTPs** — Waterpipe Tobacco Packs

## ABSTRACT

**Objectives** Despite the global increase in waterpipe tobacco smoking (WTS) including in Egypt, few studies have assessed the effectiveness of waterpipe tobacco (WT) health warnings. Egypt has used pictorial health warnings (PHWs) on waterpipe tobacco packs (WTPs) and has rotated these every two years since 2008. We explored in this qualitative study how participants perceived existing PHWs on WTPs, assessed how they interpreted novel plain packaging of WT featuring enhanced PHWs, and probed perceptions of how existing and novel sets would affect uptake or cessation of WTS.

**Design** We conducted ten qualitative focus groups and ten in-depth interviews. We explored participants' views of the four existing PHWs (occupied 50% of the front and back of WTPs, displayed cancers, and featured colourful fruits and flavors) and four novel PHWs (occupied 80% of the front and back of WTPs, displayed different topical content, with plain packaging). Transcripts were analyzed using thematic analysis.

**Setting** Rural Menoufia, urban and semi-urban Cairo, Egypt.

**Participants** 90 waterpipe smokers and non-smokers, males and females, aged 18 years or older.

**Outcomes** Perceived potential effect on WTS uptake or cessation, probing factors related to PHW content and WTP design.

**Results** Participants in focus groups and in-depth interviews thought existing WT PHWs elicited affective responses, but found them unclear or unrealistic and thought the colourful packaging detracted from the warnings. In contrast, they thought novel and larger WT PHWs presented in plain packaging might prevent WTS initiation or trigger quit attempts. Participants regarded warnings featuring proximal health risks as most likely to be acceptable.

**Conclusions** Our exploratory study suggests larger WT PHWs featuring proximal risks and

1  
2  
3 presented on plain WTPs could potentially deter experimentation with WT products among non-  
4  
5 users and promote cessation among existing users.  
6  
7

8  
9 The abstract of this study has been presented at the World Conference on Tobacco or Health,  
10  
11 2018 in South Africa: <https://doi.org/10.18332/tid/84640>.  
12  
13  
14  
15  
16  
17  
18  
19  
20  
21  
22  
23  
24  
25  
26  
27  
28  
29  
30  
31  
32  
33  
34  
35  
36  
37  
38  
39  
40  
41  
42  
43  
44  
45  
46  
47  
48  
49  
50  
51  
52  
53  
54  
55  
56  
57  
58  
59  
60

For peer review only

## ARTICLE SUMMARY

### Strengths and limitations of this study

- This is the first qualitative study to explore plain packaging of waterpipe tobacco products in a country that has existing waterpipe tobacco pictorial health warnings.
- We provide novel insights from both non-smokers and smokers into potential policy-relevant outcomes, particularly uptake and cessation of waterpipe tobacco smoking.
- Use of combined focus groups and in-depth interviews as qualitative methods offered rich understanding of perceptions related to waterpipe tobacco labelling, with respect to which contents pictorial health warnings might feature, and how design of waterpipe tobacco packs might be improved.
- Our sample of 90 individuals means we cannot generalize our findings, however we included a variety of participants, and achieved data saturation.
- While we explored projected rather than actual responses to existing and novel waterpipe tobacco pictorial health warnings with plain packaging, our findings could guide future experimental studies and assist policy-makers to improve waterpipe tobacco regulations.

### KEY WORDS

Plain packaging, Health warnings, Waterpipe tobacco, Uptake, Cessation, Qualitative research

## INTRODUCTION

The introduction of flavoured tobacco and the lack of regulatory policies have seen waterpipe tobacco smoking (WTS) increase globally.<sup>1,2</sup> Misperceptions that WTS is a safe alternative to cigarette smoking may also have contributed to rising waterpipe tobacco (WT) use,<sup>3</sup> even though WTS causes respiratory illnesses, cardiovascular diseases and adverse perinatal outcomes.<sup>4</sup> These factors have helped WTS become more socially acceptable globally, especially among youth<sup>5,6</sup> and women.<sup>7,8</sup>

WT use has extended beyond the East, where it has been present for decades, and is increasingly popular in the West, where WTS rates have reached 10% among some young adult populations in the United States and the UK.<sup>9,10</sup> The WHO Eastern Mediterranean Region (EMR) remains home to the highest WTS rates worldwide;<sup>1,11</sup> in some EMR countries, WTS has surpassed cigarette smoking in females and adolescents.<sup>12,13</sup> Egypt has witnessed a rising trend in WT use; adolescent girls (3.4%)<sup>14</sup> and university students (12.2%)<sup>15</sup> report higher WTS rates than their older counterparts (0.3% in women<sup>14</sup> and 6.2% in men<sup>16</sup>), and rurally-located Egyptian males smoke WT more (7.5%) than men living in urban regions (4.9%).<sup>16</sup> This global surge in WTS makes examining the perceived effectiveness of existing WT control policies important to inform a much needed WT regulatory framework.<sup>17-19</sup>

Applying health warnings to tobacco products can cost-effectively increase public awareness of smoking's risks, increase the likelihood of quitting among smokers, and deter smoking initiation among non-smokers.<sup>20</sup> These outcomes are mediated by several measures of effectiveness that have been organized, based on behavioural theories, within conceptual frameworks of health

1  
2  
3 warning impact.<sup>21-24</sup> In line with this evidence, guidelines for implementing Article 11 of the  
4 WHO's Framework Convention on Tobacco Control (WHO FCTC) call for on-pack pictorial  
5 health warnings (PHWs), and recommend plain packaging and increasing warning size.<sup>25</sup> Egypt,  
6 a signatory country to the WHO FCTC, has applied generic PHWs to waterpipe tobacco packs  
7 (WTPs).<sup>26</sup> Since 2008, a set of four PHWs has appeared on the bottom half of the front and back  
8 of WTPs; these warnings carry the quitline number and rotate every two years.<sup>27</sup> However,  
9 WTPs still depict colourful fruits and flavours in brand imagery.<sup>27</sup>

10  
11  
12 Several observational<sup>28</sup> and experimental studies,<sup>21</sup> suggest plain packaging with larger PHWs<sup>29</sup>  
13 could more effectively reduce tobacco smoking through increasing warning salience, making the  
14 packaging and smoking less appealing, and reducing misperceptions about product harm,<sup>30,31</sup>  
15 especially in non-smokers or non-established smokers.<sup>32</sup> Yet, while this evidence is encouraging,  
16 these studies have focussed largely on cigarettes and we know little about how PHWs could  
17 reduce non-cigarette tobacco use, particularly WTS.<sup>33</sup>

18  
19  
20 To our knowledge, only a few studies have examined the impact of WT PHWs: two online  
21 surveys from Canada<sup>34</sup> and the United States,<sup>35</sup> three qualitative studies from the UK,<sup>36</sup> Egypt<sup>37</sup>  
22 and the EMR,<sup>38</sup> and one recent Egyptian survey.<sup>39</sup> The two online surveys tested hypothetical  
23 warnings shown on computer screens rather than on WTPs and examined the effectiveness of  
24 text-only versus PHWs.<sup>34,35</sup> Both studies found that PHWs had a modest impact on established  
25 waterpipe smokers.<sup>34,35</sup> The UK qualitative study found that when warnings increased in size and  
26 packs became less branded, participants felt WTPs were less attractive and warnings were more  
27 impactful.<sup>36</sup> EMR study participants reported that PHWs improved respondents' knowledge  
28  
29  
30  
31  
32  
33  
34  
35  
36  
37  
38  
39  
40  
41  
42  
43  
44  
45  
46  
47  
48  
49  
50  
51  
52  
53  
54  
55  
56  
57  
58  
59  
60

1  
2  
3 about WTS health hazards.<sup>38</sup> These studies are important but were confined to waterpipe  
4 smokers;<sup>34-36,38</sup> while it is important to examine how WT PHWs might pertain to both smokers  
5 and non-smokers. The Egyptian qualitative study examined smokers' and non-smokers'  
6 responses to placement of PHWs on the waterpipe device. Participants reported this approach  
7 could potentially increase salience of WT PHWs, deter initiation of WTS and prompt non-  
8 established waterpipe smokers to quit.<sup>37</sup> The Egyptian survey reported that only half of 1048  
9 waterpipe smoker and non-smoker participants thought that existing PHWs on WTPs were  
10 visible; they expressed varying views on the effectiveness of WT PHWs across several measures  
11 (such as salience, credibility, perceived harm, affective reactions).<sup>39</sup> However, this survey did not  
12 examine whether participants perceived existing WT PHWs effective in deterring uptake or  
13 quitting of WTS.  
14  
15  
16  
17  
18  
19  
20  
21  
22  
23  
24  
25  
26  
27  
28  
29

30  
31 Given rising WTS rates in Egypt,<sup>14-16</sup> in 2015 the Tobacco Control Unit in the Egyptian Ministry  
32 of Health proposed amending PHW regulations and introducing plain packaging. Specifically, it  
33 recommended increasing PHW size to 80% of the pack surface, and removing colours and  
34 flavour imagery from tobacco packs. To provide preliminary insights into the potential effects of  
35 this approach, we used qualitative methods, which are particularly suited to exploring  
36 understudied areas.<sup>40,41</sup> To inform WT labelling policy, we explored how participants perceived  
37 existing PHWs on WTPs, assessed how they interpreted a hypothetical scenario where WT was  
38 presented in plain packaging and featured enhanced PHWs, and probed perceptions of how  
39 existing and novel PHWs would affect uptake or cessation of WTS.  
40  
41  
42  
43  
44  
45  
46  
47  
48  
49  
50  
51  
52  
53

## 54 **METHODS**

55  
56  
57  
58  
59  
60



## Design

The study comprised ten focus group discussions and ten in-depth interviews that took place in urban and semi-urban regions in Cairo, and a rural area in Menoufia governorate. We utilized both focus groups and in-depth interviews as complementary approaches; focus groups explored participants' interactions and whether and how consensus views evolved while in-depth interviews allowed detailed probing and deeper understanding of participants' views.<sup>40,41</sup> Some sessions were conducted in WTS usage settings, such as cafes, where we observed social and cultural dynamics of WTS and assessed WT PHW's visibility to others.

Our conceptual framework drew on the theory of planned behavior,<sup>42</sup> as outlined in IARC Handbooks of Cancer Prevention, Tobacco Control, Methods for Evaluating Tobacco Control Policies 2008.<sup>24</sup> We explored policy-relevant outcomes with respect to the perceived potential effect on WTS uptake and cessation, and probed factors related to PHW content and WTP design, including salience, affective reactions, perceived harm and credibility. This study was approved by the Ethical Review Board of the Faculty of Medicine, Ain Shams University (FMASU R 10/2015). We used SRQR guidelines for reporting qualitative research.<sup>43</sup>

## Sample

Our sample comprised men and women, 18 years of age or older, who lived in rural, urban, and semi-urban locations. We included self-identified waterpipe smokers (exclusive WT or dual users of WT and cigarettes) and non-smokers (non-users of any tobacco product), as we were interested in how warnings could influence WTS initiation as well as cessation. Participants were recruited using snowball sampling,<sup>44</sup> which enabled us to access female waterpipe smokers more

1  
2  
3 easily and thus address calls for more research into this hard-to-reach group. We explained the  
4 study purpose to people who made contact, invited them to participate in a one-on-one interview  
5 or focus group, and then set a meeting date and time. Participants did not discernibly differ by  
6 type of interview chosen.  
7  
8  
9  
10  
11  
12

13  
14 In total, 90 individuals participated, including 80 in homogenous focus groups (with respect to  
15 age, gender, smoking status) with 6–8 individuals per group, and 10 in in-depth interviews (see  
16 **Supplementary Table 1**). As WT use in Egypt is generally higher among males,<sup>16</sup> more males  
17 participated in our sessions. **Supplementary Table 2** contains details of participants'  
18 demographic characteristics.  
19  
20  
21  
22  
23  
24  
25  
26  
27

## 28 **Tools**

### 29 *Interview Guide*

30  
31 We developed the interview guide in Egyptian colloquial Arabic and incorporated qualitative  
32 measures used to assess tobacco labelling policies.<sup>24</sup> We pilot tested the interview guide for  
33 clarity and comprehensiveness, tested the appropriateness of our prompts and questions after the  
34 pilot sessions, and made modifications following discussions with the research team. We used  
35 the same guide with focus groups and in-depth interviews and probed participants' experiences  
36 of WTS, their knowledge of WT PHWs, their views on the existing and novel PHWs on WTPs,  
37 and their perceptions of placing PHWs on waterpipe devices (see **Supplementary for interview**  
38 **guide**). In this article, we focus on discussing PHWs on WTPs.  
39  
40  
41  
42  
43  
44  
45  
46  
47  
48  
49  
50  
51  
52

### 53 *Pictorial Health Warnings on Waterpipe Tobacco Packs*

1  
2  
3 The existing PHWs depicted cancers of lung, throat, mouth, and face, covered 50% of the lower  
4 surface of the front and back of the WTP against a colourful background depicting fruit and  
5 flavour imagery. The warnings included pictures, generic text and the quitline number (**Figure**  
6  
7  
8  
9  
10 **1A**).

11  
12  
13  
14 We adapted novel PHWs from a health warning database<sup>45</sup> and followed WHO FCTC  
15 recommendations for plain packaging<sup>25</sup> and WHO's publication on Evidence, Design and  
16 Implementation of Plain Packaging<sup>46</sup> building on the proposal of the Tobacco Control Unit of  
17 the Egyptian Ministry of Health; the PHW thus covered 80% of the upper surface of the front  
18 and back of the WTP against a dark uniform plain background not depicting any fruit or flavour  
19 imagery, with the remaining 20% depicting only the brand name in standardised font. The novel  
20 PHWs included pictures, text and the quitline number. Dark plain packs are perceived as more  
21 harmful<sup>46</sup> and culturally as more negative (when compared with the bright background colors of  
22 the existing WTPs) and we therefore used a drab dark brown colour (similar to that used in  
23 Australian packaging) on novel WTPs. Feedback from pilot testing indicated that the dark  
24 background color contrasted well with the white color of the textual message and the yellow  
25 background of the quitline number, making both more clear and salient. We applied newly  
26 designed PHWs to used WTPs to promote authenticity. We pilot tested health warnings  
27 messages with corresponding images for clarity and comprehension: ("Smoking kills,"  
28 "Smoking causes lung cancer", "Smoking causes clotting of blood vessels", "Smoking causes  
29 blindness", "Smoking during pregnancy harms fetus", and "Don't let your children inhale your  
30 smoke"). The warnings used were selected following discussions amongst the research team and  
31 feedback from pilot sessions, and reflected the best available evidence on WTS health  
32  
33  
34  
35  
36  
37  
38  
39  
40  
41  
42  
43  
44  
45  
46  
47  
48  
49  
50  
51  
52  
53  
54  
55  
56  
57  
58  
59  
60

1  
2  
3 outcomes.<sup>47</sup> WTS share common harms with those caused by cigarette smoking.<sup>4</sup> We sought  
4  
5 topical content showing less severe harms than those depicted in existing PHWs. The four novel  
6  
7 warnings selected included the effect of smoking during pregnancy on the fetus, effects of  
8  
9 peripheral vascular diseases affecting the feet and eye, and effects on teeth and gums (**Figure 1**  
10  
11 **B**). Although it was important to adapt the textual message to be waterpipe-specific, we did not  
12  
13 test this in the study reported here; this was assessed separately in another study of our research  
14  
15 project.  
16  
17  
18  
19  
20

### 21 **Data Collection**

22  
23 Data were collected from October 2015 to February 2016 at the Faculty of Medicine, Ain Shams  
24  
25 University in Cairo (five focus groups and five in-depth interviews), and at participants' homes  
26  
27 or in cafés for those in rural and semi-urban areas (five focus groups and five in-depth  
28  
29 interviews). All participants received an information letter explaining the study and were asked  
30  
31 to provide verbal consent prior to each discussion or interview commencing. Participants were  
32  
33 advised their data and identity would be confidential, and told they could withdraw from the  
34  
35 study at any time.  
36  
37  
38  
39

40 Each focus group or interview was moderated by two of the co-authors (AM, WS, ME, and WM)  
41  
42 and audio-recorded; each session was about one hour long. The facilitator and note taker  
43  
44 regularly switched roles to promote reflection, and the wider team critically reflected on the  
45  
46 interviews during team meetings. The facilitators followed standard procedures when discussing  
47  
48 the interview guide topics and introduced the PHW stimuli when the relevant topic was opened  
49  
50 for discussion. No further sessions were scheduled once data saturation had been reached, i.e. no  
51  
52 new themes were being generated during the discussions.<sup>48</sup>  
53  
54  
55  
56  
57

## Analysis

Two authors independently transcribed verbatim the recorded sessions in their original language then translated these into English before comparing the two transcripts to ensure inclusivity and accuracy (WH, HM); a third author (AM) back translated the transcripts independently for validity purposes; any discrepancies were resolved through discussion. Considering the identical aims and topics explored, data from focus groups and interviews were analyzed together. We analysed the data using a thematic approach.<sup>49,50</sup> We coded transcripts as the study progressed using a three-phase process that began by organizing ideas in relation to the research questions, then involved independent reviews of transcripts to identify preliminary themes and create an initial coding list.<sup>51</sup> We finally independently refined this list (AM, AA), added new codes where appropriate, and developed broader themes, that one author (HM) then reviewed across all cases. We resolved minor inconsistencies during discussion sessions and after extensive reviews of transcripts before we finalized the themes and subthemes (see **Supplementary Table 3**). In this article, we focus on policy-relevant outcomes relevant to PHWs on WTPs as described above in methods “design”.

## Patient and Public Involvement

Patient and public were not involved in the development of the research question and outcome measures, the design, recruitment and conduct of the study. The results of this study will be disseminated to study participants via newsletters and social media outlets.

## RESULTS

1  
2  
3 The 90 participants in focus groups and interviews comprised more males (72.2%) than females  
4 (27.8%) and participants' mean age was 33.4 ±11.6 (see **Supplementary Table 2**). We  
5 identified the overall themes: warning label content and pack design features, and discuss these  
6 in relation to WTS uptake and cessation comparing throughout existing and novel sets. During  
7 analysis of the transcripts, we did not detect differences between the focus group and individual  
8 interview data. Therefore, we report below results from both focus groups and individual  
9 interviews. We cite exemplar quotations below and provide a more detailed set of quotations in  
10 **Supplementary Table 4**, where we also indicate the gender, age group, smoking status, location  
11 of participants, and source of quotations.  
12  
13  
14  
15  
16  
17  
18  
19  
20  
21  
22  
23  
24  
25

26 Most participants were aware of warning labels on WTPs and reported seeing these when  
27 purchasing or preparing their tobacco. However, those using waterpipes in cafes or were less  
28 likely to see WTPs as WT was prepared out of their sight "*I was downtown and we saw smokers*  
29 *in cafes but shisha is always served ready...I never saw the packs*" (Female non-  
30 smoker, >25y, semi-urban, FGD).  
31  
32  
33  
34  
35  
36  
37  
38

### 39 **Warning label content – perceived likely effect of existing and novel PHWs**

40  
41 Participants who were aware of existing WTP warnings recalled these as disturbing; however,  
42 several felt these warnings had limited impact. Many recalled the lung cancer PHW and the text  
43 “smoking is hazardous to health and causes death” as the most believable warning, yet also the  
44 least impactful, because of wearout: "*...the other warnings like the lung cancer one...people got*  
45 *used to them after a while*" (Male smoker, >25y, rural, IDI). Participants found the existing  
46 warnings, which all featured cancer-related harms, frightening and disgusting, and non-smokers,  
47 particularly, avoided looking at them. Nonetheless, several questioned the harms existing PHWs  
48  
49  
50  
51  
52  
53  
54  
55  
56  
57  
58  
59  
60

1  
2  
3 featured and saw these as exaggerated: *"I don't want to look at it from near or far...they want to*  
4 *send us a message that it is harmful but in an awful and overstating way"* (Female smoker, <25y,  
5 *urban,FGD*).  
6  
7  
8  
9

10  
11  
12 Some also found existing warnings difficult to understand: *"It looks like a bad thing but it is not*  
13 *clear what it is"* (Female non-smoker, >25y, semi-urban, FGD). These participants saw existing  
14 PHWs as unconvincing and exaggerated as they had not seen such conditions in real life and  
15 sometimes knew people who had smoked for many years with apparent impunity: *"I have seen*  
16 *the warning on the packs but I have never seen anything such as that in real life...I know a*  
17 *person who has been smoking since the eighties and nothing happened to him"* (Male  
18 *smoker, >25y, rural, FGD*).  
19  
20  
21  
22  
23  
24  
25  
26  
27  
28  
29

30  
31 Participants often denied risks associated with occasional smoking; one exempted himself from  
32 harm on the grounds that he did not smoke heavily and had seen no direct evidence of the harms  
33 presented in PHWs: *"I don't think I can be affected by smoking, because I don't smoke heavily;*  
34 *only once a day, besides...we have never seen the conditions in the warnings in real life"* (Male  
35 *smoker, >25y, rural, IDI*). Several thought harms would not occur until they were older, and  
36 believed that, if and when they experienced these, they could quit.  
37  
38  
39  
40  
41  
42  
43  
44  
45  
46

47 By contrast, most participants favoured the new PHWs, which they first viewed during the  
48 interview sessions. They found these clearer, more understandable and realistic than existing  
49 PHWs, and more likely to capture their attention. Participants also commented that the new  
50 PHWs were easily understood even without text and thus likely to be effective among people  
51  
52  
53  
54  
55  
56  
57  
58  
59  
60

1  
2  
3 with varying literacy: *"This one is more realistic for its purpose and understandable; even*  
4 *without any text...it is a more convincing warning"* (Female non-smoker,>25y,semi-  
5 *urban,FGD*).  
6  
7  
8  
9

10  
11 Specifically, participants found the new warnings featuring more immediate, proximal risks had  
12 the strongest perceived impact, particularly those showing harmful effects on teeth. Female  
13 participants also felt strongly affected by the PHW illustrating harm to unborn babies, which  
14 forced them to confront the harm they imposed on others: *"The baby warning is effective*  
15 *because it is not about me anymore...This is something way more important than me...I fear for*  
16 *my kid more than I fear for myself"* (Female non-smoker,>25y,semi-urban,FGD). However,  
17 some continued to see images showing potential harms they may experience as overstated and  
18 unlikely to happen in the near future: *"This didn't happen before to anyone (foot*  
19 *warning)...we're still young...we won't get this"* (Female smoker,<25y,urban,FGD).  
20  
21  
22  
23  
24  
25  
26  
27  
28  
29  
30  
31

32  
33  
34 Although participants saw the new PHWs as more effective, they suggested improvements to the  
35 warning content. In line with earlier comments about perceived exaggeration, they sought greater  
36 credibility: *"It is very important that you convince me...put something there that I'll believe"*  
37 (Male smoker,>25y,semi-urban,IDI). Some suggested presenting testimonials: *"Show smokers*  
38 *live people who were damaged because of shisha smoking and others who quit and improved"*  
39 (Male non-smoker,>25y,rural,FGD) and others recommended illustrating the effects WTS has  
40 on women by featuring relevant cancers and congenital diseases: *"Direct warnings addressing*  
41 *women like cancer of the breast or the uterus or congenital anomalies to the fetus"* (Female non-  
42 *smoker,>25y,semi-urban,FGD*). Some also thought PHWs targeting women could encourage  
43 them to persuade their partners to quit.  
44  
45  
46  
47  
48  
49  
50  
51  
52  
53  
54  
55  
56  
57  
58  
59  
60



1  
2  
3  
4  
5  
6 Several participants thought PHWs should target youth before they start smoking and suggested  
7  
8 warnings showing how WTS smokers' social relationships (e.g., sexual dysfunction warnings)  
9  
10 would have high impact: *"We want a real effect that already happened...like for example the*  
11  
12 *side effects on sexual functioning...that will definitely affect smokers"* (Male non-  
13  
14 *smoker,>25y,rural,FGD).*

15  
16  
17  
18  
19 In addition, participants also suggested printing text warnings including details of the hazardous  
20  
21 ingredients of smoke, with more information on health risks and cessation options inserted on the  
22  
23 inside or outside of the WTP, together with external PHWs would promote cessation behaviour,  
24  
25 and enhance the impact of novel warnings.  
26  
27  
28  
29

### 30 31 **Design Features of WTPs – perceived likely effect of existing and novel PHWs**

32  
33 As well as responding to the different warning content, participants also noted that the different  
34  
35 design elements used in the novel PHWs had improved the impact these had. Several commented  
36  
37 on how bright colours and fruit imagery deflected attention away from PHWs and promoted  
38  
39 experimentation: *"The peach drawing is appetizing... [and] drawing attention away from the*  
40  
41 *warning...better put the warning on the top! The pack should be dark...this colour is very*  
42  
43 *bright... just like bonbon packs"* (Female non-smoker,>25y,semi-urban,FGD). They found it  
44  
45 difficult to associate fruit flavours with harm and thought the images invited trial: *"The pictures*  
46  
47 *and the smell of fruits make a passerby want to try them all"*(Female non-smoker,>25y,semi-  
48  
49 *urban,IDI).*  
50  
51  
52  
53  
54  
55  
56  
57  
58  
59  
60

1  
2  
3 By contrast, participants thought the plain background, contrasting colours, absence of fruit and  
4 flavour images, and larger warning images shown on the proposed new PHWs increased impact,  
5 reduced distraction, and encouraged participants to look more closely at the pack. One noted:  
6  
7  
8  
9  
10 “Here the picture is bigger and the text has a clear message...together with this dark colour...it  
11 makes me focus only on the warning...all this makes it more effective” (Male  
12 smoker,<25y,urban,FGD). Together, the altered content and enhanced design attributes  
13 increased participants’ perceptions of the impact the novel PHWs would have.  
14  
15  
16  
17  
18  
19  
20

21 Overall, most waterpipe smoker and non-smoker participants thought PHWs would deter non-  
22 smokers from trying WTS but were less optimistic about the effects on smokers. One noted: “If  
23 we (non-smokers) lusted to smoke it and saw pictures like these...we won’t smoke, but those who  
24 do actually smoke already would be indifferent” (Male non-smoker,>25y,urban,FGD). Smokers  
25 themselves also felt PHWs had less effect because they had become accustomed to seeing the  
26 images: “I used to think about the hazards a lot when the pictures first appeared...then I got  
27 used to them...I don’t pay them attention anymore” (Male smoker,<25y,semi-urban,IDI). Others  
28 reported using stickers to obscure PHWs or avoiding packs with PHWs they found particularly  
29 confronting: “I avoid buying the picture of the tongue in particular (referring to the mouth cancer  
30 warning)” (Male smoker,<25y,semi-urban,FGD)  
31  
32  
33  
34  
35  
36  
37  
38  
39  
40  
41  
42  
43  
44  
45  
46

47 As with the current PHWs, most waterpipe smoker and non-smoker participants thought the  
48 proposed PHWs would have a stronger effect on non-smokers than on long-term smokers,  
49 though some indicated they would avoid some warnings and may reduce their WTS: “If I go to  
50 buy moassel (waterpipe tobacco) and found this pack, I’ll go to another shop to buy another  
51  
52  
53  
54  
55  
56  
57  
58  
59  
60

1  
2  
3 *one...if I don't find a picture that makes me comfortable...I won't smoke that day...but if they're*  
4 *all like this...I guess I'll try to quit...or... at least decrease my habit" (Male*  
5 *smoker,>25y,rural,IDI). In general, participants thought that the new PHW set had greater*  
6 *potential to deter WTS, especially among new smokers: "If I'll smoke and saw it... for sure I*  
7 *won't smoke at the moment...it's disgusting" (Male non-smoker,<25y,rural,FGD).*  
8  
9  
10  
11  
12  
13  
14  
15  
16

## 17 **DISCUSSION**

18  
19 Our qualitative study found that participants privileged the short-term benefits they received over  
20 the longer-term risks they faced. They saw existing PHWs as less likely to influence long-term  
21 smokers,<sup>52</sup> especially if they had not experienced any health effects. This finding is consistent  
22 with other studies that found age is negatively associated with perceived risks of smoking and  
23 with attention to either graphic or text warnings on tobacco packages.<sup>53</sup>  
24  
25  
26  
27  
28  
29  
30  
31  
32

33 However, the existing and novel PHWs tested appeared more likely to influence non-smokers  
34 and less-experienced smokers by creating awareness of the health risks WTS presents. These  
35 findings are in line with previous research<sup>32</sup> and address calls for research into the effects of  
36 tobacco packaging on smoking uptake.<sup>54</sup> We also provide preliminary evidence that presenting  
37 WT in plain packaging could deter non-smokers from experimenting WTS. The existing and the  
38 novel PHWs differed in three main ways: the topical imagery content, the size of the warning,  
39 and the pack design. We explain below how policymakers should consider these three elements  
40 when adopting or amending regulations for PHWs on WTPs.  
41  
42  
43  
44  
45  
46  
47  
48  
49  
50  
51  
52

53 Although existing PHWs induced strong negative emotional reactions, several participants  
54  
55  
56  
57

1  
2  
3 viewed these warnings as exaggerated and felt the health risk depicted was unlikely to occur.  
4  
5 While PHWs that arouse fear may increase risk perceptions, they did not necessarily promote  
6  
7 greater message acceptance,<sup>55-57</sup> Our findings also show a complex relationship between the  
8  
9 emotional response elicited and the salience and perceived impact of a message. The PHW  
10  
11 depicting oral harm was minimally disturbing, yet participants saw it as the strongest and the  
12  
13 most salient warning; by contrast, participants regarded the confronting vascular harm PHW as  
14  
15 less effective because the condition was less salient and seen as more distal. Our findings thus  
16  
17 support earlier studies analysing the relationship between risk perception, believability, and  
18  
19 temporal distance.<sup>58</sup>  
20  
21  
22  
23  
24  
25

26 Young adults and women found gender- and age-specific messages more persuasive,<sup>59</sup>  
27  
28 suggesting strategies targeting these demographic groups are crucially important<sup>60</sup> For example,  
29  
30 messages about negative health effects from passive smoking, sexual dysfunction and intimacy,  
31  
32 miscarriages, and harmful effects on infants and children were considered more persuasive  
33  
34 among younger adults and women than other messages.  
35  
36  
37  
38  
39

40 Another plausible approach suggested by participants was to develop a visible and sensible  
41  
42 message in both text and graphic formats that target waterpipe smokers with detailed cessation  
43  
44 information inserted on the WTP. Combined text and graphic warnings elicit adverse reactions to  
45  
46 smoking among non-smokers and smokers,<sup>61</sup> especially on the sustainability of quit behaviour.<sup>62</sup>  
47  
48 In line with these suggestions, the design of novel warnings helped make the cessation quit line  
49  
50 more prominent by the contrasting dark plain background.  
51  
52  
53  
54  
55  
56  
57  
58  
59  
60

1  
2  
3 We also found specific design elements that could inform future PHW development. Some  
4 participants thought plain packs increased the salience and effectiveness of the warnings, and  
5 reduced the appeal of the packaging and misperceptions of harm. These findings are consistent  
6 with the literature on plain packaging.<sup>46,54</sup> Evidence that flavoured cigarettes reduce harm  
7 perceptions appears relevant to WT<sup>63,64</sup> as participants noted that images of fruits or appealing  
8 flavours attracted them to WTS and deflected their attention from warning information.  
9 Furthermore, image clarity and size enhanced acceptance and risk perception among participants,  
10 a finding also reported by Jawad and colleagues.<sup>36</sup>  
11  
12  
13  
14  
15  
16  
17  
18  
19  
20  
21

## 22 **Strengths and Limitations**

23 To our knowledge, this is the first qualitative study to assess smokers' and non-smokers'  
24 awareness and acceptance of currently used and novel WT PHWs with plain packaging. Our  
25 novel warnings simulated how PHWs appear (or could appear) on packs and devices, we  
26 explored projected rather than real-life responses. Experimental work could estimate the likely  
27 impact of our new label designs, including more targeted PHWs, on waterpipe smokers' risk  
28 perceptions, attitudes and likely cessation responses. Future research could also develop a more  
29 comprehensive analysis of factors motivating and reinforcing WTS uptake. Given our findings  
30 that PHWs have the potential to reduce WTS initiation, it is also important to test whether the  
31 PHW themes we developed could be used in wider health promotion campaigns to reduce the  
32 appeal and perceived acceptability of WTS. Future research could explore how WT warnings  
33 featuring waterpipe-specific messages would affect awareness and perceptions of WTS.  
34  
35  
36  
37  
38  
39  
40  
41  
42  
43  
44  
45  
46  
47  
48  
49  
50

51 Our small sample means we cannot generalize our findings, though we note a sample of 90  
52 individuals is still substantial, and saturation had been reached in the responses received. Despite  
53  
54  
55  
56  
57

1  
2  
3 these limitations, our study provides novel insights into the factors supporting WTS uptake,  
4 suggests themes PHWs could feature, and outlines how PHWs' format could be improved. We  
5 recognize this work programme faces challenges, given the limited resources and capacity in  
6 low- and middle-income countries; nonetheless, our findings represent an important step in  
7 supporting a comprehensive regulatory framework that reduces WTS and the harm this form of  
8 tobacco use causes.  
9  
10  
11  
12  
13  
14  
15  
16  
17  
18

### 19 *Conclusions*

20  
21 This exploratory study suggests that PHWs on WTPs have the potential to reduce uptake and cue  
22 quit attempts but might be more effective if PHWs used more impactful designs. Specifically, we  
23 provide preliminary evidence that enhanced PHWs using contrasting background colours and  
24 plain packaging, offering no association to fruits or flavours, targeting age and gender, and  
25 displaying proximal health risks, might enhance both warning impact and risk perception. These  
26 alternative designs could be further developed and tested in other studies. The findings offer  
27 policymakers designing and implementing health warnings on WT products clearer evidence on  
28 which to base their decisions.  
29  
30  
31  
32  
33  
34  
35  
36  
37  
38  
39  
40  
41  
42  
43  
44  
45  
46  
47  
48  
49  
50  
51  
52  
53  
54  
55  
56  
57  
58  
59  
60

1  
2  
3 **ACKNOWLEDGEMENTS** We thank the participants of this research and Joe Petrik for  
4  
5 copyediting a previous version of this article. The PHWs presented in this study were used after  
6  
7 signing a written partnership agreement between the Tobacco Control Unit in the Egyptian  
8  
9 Ministry of Health and the research team. The abstract of this study has been presented at the  
10  
11 World Conference on Tobacco or Health, 2018 in South Africa:  
12

13 <https://doi.org/10.18332/tid/84640>.

14  
15  
16  
17  
18 **AUTHOR CONTRIBUTORS** AM conceptualized and designed the study, developed its tools,  
19  
20 and wrote the first draft of this article. AM, ME, WS, WMH carried out the study. SL provided  
21  
22 approval for using PHWs. WMH and HM transcribed the data. AA, HM, AM and JH analyzed  
23  
24 the data. AM, HM, AA and JH further developed the paper. All authors critically revised  
25  
26 contents and provided final approval on the submitted manuscript.  
27  
28

29  
30  
31 **FUNDING** This work was carried out with the aid of a grant from the International  
32  
33 Development Research Center, Ottawa, Canada through the American University of Beirut, the  
34  
35 Tobacco Control Research Group, to study waterpipe tobacco smoking prevention and  
36  
37 intervention programs in the region, as a part of the project “Shaping Research for Health in the  
38  
39 Arab World: A Systems and Network Approach to Advance Knowledge, Inform Policy, and  
40  
41 Promote Public Health” (Grant 106981-001)  
42  
43

44  
45  
46 **COMPETING INTERESTS** None declared.  
47

48  
49 **ETHICS APPROVAL** This study was approved by the Research Ethics Committee of Faculty  
50  
51 of Medicine, Ain Shams University (FMASU R 10/2015).  
52

53  
54  
55 **CHECKLIST FOR REPORTING GUIDELINES** We used SRQR guidelines for reporting  
56  
57

1  
2  
3 qualitative research.  
4  
5  
6

7  
8 **DATA SHARING STATEMENT** No additional data are available.  
9  
10  
11  
12  
13  
14  
15  
16  
17  
18  
19  
20  
21  
22  
23  
24  
25  
26  
27  
28  
29  
30  
31  
32  
33  
34  
35  
36  
37  
38  
39  
40  
41  
42  
43  
44  
45  
46  
47  
48  
49  
50  
51  
52  
53  
54  
55  
56  
57  
58  
59  
60

For peer review only



## REFERENCES

1. Maziak W, Ben Taleb Z, Bahelah R, et al. The global epidemiology of waterpipe smoking. *Tob Control* 2015;24(1):i3-i12. doi:10.1136/tobaccocontrol-2014-051903.
2. Jawad M, Charide R, Waziry R, et al. The prevalence and trends of waterpipe tobacco smoking: A systematic review. *PLoS ONE* 2018; 13(2): e0192191. doi.org/10.1371/journal.pone.0192191.
3. Jawad M. Waterpipe Tobacco Smoking: A less Harmful Alternative? In: Loddenkemper R, Kreuter M (eds): *The Tobacco Epidemic*, ed 2, rev. and ext. Prog Respir Res. Basel, Karger, 2015;42:252-257. doi:10.1159/000369505.
4. Waziry R, Jawad M, Ballout RA, et al. The effects of waterpipe tobacco smoking on health outcomes: an updated systematic review and meta-analysis. *Int J Epidemiol* 2017;46(1):32-43. doi:10.1093/ije/dyw021.
5. Soule EK, Lipato T, Eissenberg T. Waterpipe tobacco-smoking: a new smoking epidemic among the young? *Curr Pulmonol Rep* 2015;4(4):163-172. doi:10.1007/s13665-015-0124-6.
6. Akl EA, Ward KD, Bteddini D, et al. The allure of the waterpipe: a narrative review of factors affecting the epidemic rise in waterpipe smoking among young persons globally. *Tob Control* 2015;24:i13-i21. doi:10.1136/tobaccocontrol-2014-051906.
7. Akl EA, Gunukula SK, Aleem S, et al. The prevalence of waterpipe tobacco smoking among the general and specific populations: a systematic review. *BMC Public Health* 2011;11:244. doi:10.1186/1471-2458-11-244.
8. Khalil J, Afifi R, Fouad FM, et al. Women and Waterpipe Tobacco Smoking in the Eastern Mediterranean Region: Allure or Offensiveness? *Women & Health* 2013;53(1):100-116. doi:10.1080/03630242.2012.753978.

- 1  
2  
3 9. Cobb C, Ward KD, Maziak W, et al. Waterpipe tobacco smoking: An emerging health crisis  
4 in the United States. *Am J Health Behav* 2010;34(3),275–285. PMID: PMC3215592.  
5  
6  
7  
8 10. Grant A, Morrison R, Dockrell RJ. The Prevalence of waterpipe (Shisha, Narghille, Hookah)  
9 use among adults in great britain, and factors associated with waterpipe use: data from cross-  
10 sectional online surveys in 2012 and 2013. *Nicotine Tob Res* 2014;16(7): 931–938.  
11  
12  
13  
14  
15 doi:10.1093/ntr/ntu015.  
16  
17 11. Maziak W, Nakkash R, Bahelah R, et al. Tobacco in the Arab world: old and new epidemics  
18 amidst policy paralysis. *Health Policy Plan* 2013;29:784–94.  
19  
20  
21  
22 doi.org/10.1136/tobaccocontrol-2014-051903.  
23  
24 12. Mostafa A, El Houssinie M, Aboul Foutouh A. Multiple Tobacco Use among Young Adult  
25 Waterpipe Smokers in Egypt. *East Mediterr Health J* 2018;24(x):xxx–xxx. [https://](https://doi.org/2018.24.2.XX)  
26  
27  
28  
29 doi.org/2018.24.2.XX. In press.  
30  
31 13. Jawad M, Lee JT, Millett C. Waterpipe Tobacco Smoking Prevalence and Correlates in 25  
32 Eastern Mediterranean and Eastern European Countries: Cross-Sectional Analysis of the  
33 Global Youth Tobacco Survey. *Nicotine Tob Res* 2016;18(4):395-402.  
34  
35  
36  
37  
38  
39 doi:10.1093/ntr/ntv101.  
40  
41 14. El Awa F, Fouad H, El Naga RA, et al. Prevalence of tobacco use among adult and  
42 adolescent females in Egypt. *East Mediterr Health J* 2013;19(8):749–54. PMID:24975361.  
43  
44  
45 15. Shisha and smokeless tobacco use among university students in Egypt: prevalence,  
46 determinants, and economic aspect. A joint report by the Egyptian Ministry of Health and  
47 Population and the World Health Organization 2014.  
48  
49  
50  
51  
52 [http://applications.emro.who.int/dsaf/EMROPUB\\_2014\\_EN\\_1752.pdf?ua=1&ua=1](http://applications.emro.who.int/dsaf/EMROPUB_2014_EN_1752.pdf?ua=1&ua=1)  
53  
54 (accessed May 2017).  
55  
56  
57  
58  
59  
60

- 1  
2  
3 16. World Health Organization: Global Adult Tobacco Survey: Egypt Country Report 2009.  
4  
5 [http://www.who.int/tobacco/surveillance/gats\\_rep\\_egypt.pdf](http://www.who.int/tobacco/surveillance/gats_rep_egypt.pdf) (accessed September 2017).  
6  
7  
8 17. World Health Organization Framework Convention on Tobacco Control: Control and  
9  
10 prevention of waterpipe tobacco products (document FCTC/COP/7/10). In: Conference of  
11  
12 the parties to the WHO framework convention on tobacco control, seventh session, Delhi,  
13  
14 India, 7-12 November 2016. World Health Organization, Geneva.  
15  
16 [http://www.who.int/fctc/cop/cop7/FCTC\\_COP\\_7\\_10\\_EN.pdf](http://www.who.int/fctc/cop/cop7/FCTC_COP_7_10_EN.pdf) (accessed May 2017).  
17  
18  
19 18. Jawad M, El Kadi L, Mughrabil S, et al. Waterpipe tobacco smoking legislation and policy  
20  
21 enactment: a global analysis. *Tob Control* 2015;24(1):i60-i65. doi:10.1136/tobaccocontrol-  
22  
23 2014-051911.  
24  
25  
26 19. Salloum RG, Asfar T, Maziak W. Toward a Regulatory Framework for the Waterpipe. *Am J*  
27  
28 *Public Health* 2016;106(10):1773-7. doi:10.2105/AJPH.2016.303322.  
29  
30  
31 20. Hammond D. Health warning messages on tobacco products: a review. *Tob Control*  
32  
33 2011;20(5):327-337. doi.org/10.1136/tc.2010.037630.  
34  
35  
36 21. Noar SM, Hall MG, Francis DB, et al. Pictorial cigarette pack warnings: a meta-analysis of  
37  
38 experimental studies. *Tob Control* 2016;25(3):341-54. doi:10.1136/tobaccocontrol-2014-  
39  
40 051978.  
41  
42  
43 22. Yong HH, Borland R, Thrasher JF, et al. Mediation pathways of the impact of cigarette  
44  
45 warning labels on quit attempts. *Health Psychol* 2014;33(11):1410-20. doi:  
46  
47 10.1037/hea0000056.  
48  
49  
50 23. Emery LF, Romer D, Sheerin KM, Jamieson KH, Peters E. Affective and Cognitive  
51  
52 Mediators of the Impact of Cigarette Warning Labels. *Nicotine Tob Res* 2014;16(3):263-9.  
53  
54 doi.org/10.1093/ntr/ntt124.  
55  
56  
57  
58  
59  
60

- 1  
2  
3 24. IARC Handbooks of Cancer Prevention, Tobacco Control. Methods for Evaluating Tobacco  
4 Control Policies 2008; 12. Lyon, France. [http://www.iarc.fr/en/publications/pdfs-](http://www.iarc.fr/en/publications/pdfs-online/prev/handbook12/Tobacco_vol12.pdf)  
5 [online/prev/handbook12/Tobacco\\_vol12.pdf](http://www.iarc.fr/en/publications/pdfs-online/prev/handbook12/Tobacco_vol12.pdf) (accessed April, 2015).  
6  
7  
8  
9  
10 25. World Health Organization. Guidelines for implementation of Article 11 of the WHO  
11 Framework Convention on Tobacco Control (Packaging and labelling of tobacco products)  
12 2008. [http://www.who.int/fctc/guidelines/article\\_11.pdf?ua=1](http://www.who.int/fctc/guidelines/article_11.pdf?ua=1) (accessed April, 2015).  
13  
14  
15  
16  
17 26. Mostafa A, Kashiwabara M. Tobacco packaging and labelling policies in countries of the  
18 Eastern Mediterranean and Western Pacific Regions: Post-deadline assessment of the time-  
19 bound measures of WHO FCTC Article 11. *Tobacco Prevention & Cessation*  
20 2016;2(November):78. doi:10.18332/tpc/66793.  
21  
22  
23  
24  
25  
26 27. World Health Organization: Tobacco control country profiles 2017. Egypt.  
27  
28 [http://www.who.int/tobacco/surveillance/policy/country\\_profile/egy.pdf?ua=1](http://www.who.int/tobacco/surveillance/policy/country_profile/egy.pdf?ua=1) (accessed 15  
29 December 2017).  
30  
31  
32  
33 28. Stead M, Moodie C, Angus K, et al. Is Consumer Response to Plain/Standardised Tobacco  
34 Packaging Consistent with Framework Convention on Tobacco Control Guidelines? A  
35 Systematic Review of Quantitative Studies. *PLoS ONE* 2013;8(10): e75919.  
36  
37  
38  
39  
40  
41  
42 29. Wakefield M, Coomber K, Zacher M, et al. Australian adult smokers' responses to plain  
43 packaging with larger graphic health warnings 1 year after implementation: results from a  
44 national cross-sectional tracking survey. *Tob Control* 2015;24(2):ii17–ii25.  
45  
46  
47  
48  
49  
50  
51 30. Durkin S, Brennan E, Coomber K, et al. Short-term changes in quitting-related cognitions  
52 and behaviours after the implementation of plain packaging with larger health warnings:  
53  
54  
55  
56  
57  
58  
59  
60

- 1  
2  
3 findings from a national cohort study with Australian adult smokers. *Tob*  
4  
5 *Control* 2015;24:ii26-ii32. doi:10.1136/tobaccocontrol-2014-052058.  
6  
7  
8 31. Mays D, Niaura RS, Evans WD, et al. Cigarette packaging and health warnings: the impact  
9  
10 of plain packaging and message framing on young smokers. *Tob Control* 2015;24(e1):e87-  
11  
12 92. doi: 10.1136/tobaccocontrol-2013-051234.  
13  
14  
15 32. Munafo MR, Roberts N, Bauld L, et al.: Plain packaging increases visual attention to health  
16  
17 warnings on cigarette packs in non-smokers and weekly smokers but not daily smokers.  
18  
19 *Addiction* 2011;106(8):1505-10. doi:10.1111/j.1360-0443.2011.03430.x  
20  
21  
22 33. Ross JC, Noar SM, Sutfin EL: Systematic Review of Health Communication for Non-  
23  
24 Cigarette Tobacco Products. *Health Communication* 2017;  
25  
26 doi:10.1080/10410236.2017.1407274.  
27  
28  
29 34. Mohammed H T. The efficacy of viewing health warnings on shisha smoking among shisha  
30  
31 smokers.  
32  
33 [https://uwspace.uwaterloo.ca/bitstream/handle/10012/7419/Mohammed\\_HebaTallah.pdf?seq](https://uwspace.uwaterloo.ca/bitstream/handle/10012/7419/Mohammed_HebaTallah.pdf?sequence=1)  
34  
35 [uence=1](https://uwspace.uwaterloo.ca/bitstream/handle/10012/7419/Mohammed_HebaTallah.pdf?sequence=1) (accessed September, 2017).  
36  
37  
38 35. Islam F, Salloum RG, Nakkash R, et al.: Effectiveness of health warnings for waterpipe  
39  
40 tobacco smoking among college students. *Int J Public Health* 2016;61(6):709-715. doi:  
41  
42 10.1007/s00038-016-0805-0.  
43  
44  
45 36. Jawad M, Bakir A, Ali M, et al.: Impact of Waterpipe Tobacco Pack Health Warnings on  
46  
47 Waterpipe Smoking Attitudes: A Qualitative Analysis among Regular Users in London.  
48  
49 *BioMed Res Int* 2015:745865.doi: 10.1155/2015/745865.  
50  
51  
52 37. Mostafa A, Mohammed HT, Hussein WM, et al. Would placing pictorial health warnings on  
53  
54 waterpipe devices reduce waterpipe tobacco smoking? A qualitative exploration of Egyptian  
55  
56  
57  
58  
59  
60

- 1  
2  
3 waterpipe smokers' and non-smokers' responses. *Tob Control* 2018 Published Online First:  
4  
5 06 July 2018. doi: 10.1136/tobaccocontrol-2018-054494.  
6  
7  
8 38. Salloum RG, Abu-Rmeileh N, Hamadeh R, et al.: Policy-Relevant Context of Waterpipe  
9  
10 Tobacco Smoking among University Students in Six Countries Across the Eastern  
11  
12 Mediterranean Region: A Qualitative Study. *Asian Pac J Cancer Prev* 2017;18(9): 2533-  
13  
14 2540. doi:10.22034/APJCP.2017.18.9.2533.  
15  
16  
17 39. Mostafa A, Mohammed HT. Graphic health warnings and their best position on waterpipes:  
18  
19 A cross-sectional survey of expert and public opinion. *Tobacco Prevention & Cessation*  
20  
21 2017; 3(June):116. doi: [10.18332/tpc/70873](https://doi.org/10.18332/tpc/70873).  
22  
23  
24 40. Jones R: Why do qualitative research? *BMJ* 1995; 311(6996):2. PMID: PMC2550075.  
25  
26  
27 41. Pope K, Mays R: Qualitative research: Reaching the parts other methods cannot reach: An  
28  
29 introduction to qualitative methods in health and health services research. *BMJ* 1995; 311  
30  
31 (6996):42-5. PMID: PMC2550091.  
32  
33  
34 42. Ajzen I. The theory of planned behavior. *Organ Behav Hum Decis Process* 1991;50(2):179-  
35  
36 211. [https://doi.org/10.1016/0749-5978\(91\)90020-T](https://doi.org/10.1016/0749-5978(91)90020-T).  
37  
38  
39 43. O'Brien BC, Harris IB, Beckman TJ, et al. Standards for reporting qualitative research: a  
40  
41 synthesis of recommendations. *Acad Med* 2014;89(9):1245-1251.  
42  
43  
44 44. Feldman MS, Bell J, Berger MT. *Gaining Access: A Practical and Theoretical Guide for*  
45  
46 *Qualitative Researchers*, Altamira Press 2003, Oxford, UK.  
47  
48  
49 45. World Health Organization Framework Convention on Tobacco Control. Health Warnings  
50  
51 Database: <http://www.who.int/tobacco/healthwarningsdatabase/en/> (accessed April 2015).  
52  
53  
54  
55  
56  
57  
58  
59  
60

- 1  
2  
3 46. World Health Organization. Evidence, Design and Implementation of Plain Packaging at:  
4  
5 [http://apps.who.int/iris/bitstream/10665/207478/1/9789241565226\\_eng.pdf?ua=1](http://apps.who.int/iris/bitstream/10665/207478/1/9789241565226_eng.pdf?ua=1) (accessed  
6  
7 December 2016).  
8  
9
- 10 47. Akl EA, Gaddam S, Gunukula SK, et al. The effects of waterpipe tobacco smoking on health  
11  
12 outcomes: A systematic review. *Int J Epidemiol* 2010;39:834–857. doi:10.1093/ije/ dyq002.  
13
- 14 48. Walker JL. Research column. The use of saturation in qualitative research. *Can J Cardiovasc*  
15  
16 *Nurs* 2012;22:37-46. PMID: 22803288.  
17
- 18 49. Braun V, Clarke V. Using thematic analysis in psychology. *Qualitative Research in*  
19  
20 *Psychology* 2006; 3(2): 77–101. doi:10.1191/1478088706qp063oa.  
21  
22
- 23 50. Pope C, Ziebland S, Mays N: Qualitative research in health care: Analysing qualitative data.  
24  
25 *BMJ* 2000;320(7227):114–116. PMID: 1117368  
26  
27
- 28 51. Boyatzis RE: Transforming qualitative information: thematic analysis and code development  
29  
30 California: Sage Publications; 1998.  
31  
32
- 33 52. White V, Bariola E, Faulkner A, et al. Graphic Health Warnings on Cigarette Packs: How  
34  
35 Long Before the Effects on Adolescents Wear Out? *Nicotine Tob Res* 2015;17(7):776-83.  
36  
37 doi:10.1093/ntr/ntu184.  
38  
39
- 40 53. Robert ME, Peters E, Ferketich AK, et al. The Age-related Positivity Effect and  
41  
42 Tobacco Warning Labels. *Tob Regul Sci* 2016;2(2):176-185. doi:10.18001/TRS.2.2.8.  
43  
44
- 45 54. McNeill A, Gravely S, Hitchman SC, et al. Tobacco packaging design for reducing tobacco  
46  
47 use. *Cochrane Database of Systematic Reviews* 2017, Issue 4. Art. No.: CD011244.  
48  
49 doi:10.1002/14651858.CD011244.pub2.  
50  
51  
52  
53  
54  
55  
56  
57  
58  
59  
60

- 1  
2  
3 55. Peters GJ, Ruiter RA, Kok G. Threatening communication: A critical re-analysis and a  
4 revised meta-analytic test of fear appeal theory. *Health Psychology Review* 2013;7(1):S8–  
5 S31. doi:10.1080/17437199.2012.703527.  
6  
7  
8  
9  
10 56. Thrasher J, Swayampakala K, Borland R, et al. Influences of Self-Efficacy, Response  
11 Efficacy, and Reactance on Responses to Cigarette Health Warnings: A Longitudinal Study  
12 of Adult Smokers in Australia and Canada. *Health Commun* 2016;31(12):1517-1526.  
13  
14  
15  
16  
17  
18  
19 57. Droulers O, Gallopel-Morvan K, Lacoste-Badie S, et al. The influence of threatening visual  
20 warnings on tobacco packaging: Measuring the impact of threat level, image size, and type of  
21 pack through psychophysiological and self-report methods. *PLoS One* 2017;12(9):e0184415.  
22  
23  
24  
25  
26  
27  
28  
29 58. Hoek J, Hoek-Sims A, Gendall P. A qualitative exploration of young adult smokers'  
30 responses to novel tobacco warnings. *BMC Public Health* 2013;13:609. doi: 10.1186/1471-  
31 2458-13-609.  
32  
33  
34  
35 59. Jaber R, Madhivanan P, Khader Y, et al. Predictors of waterpipe smoking progression among  
36 youth in Irbid, Jordan: A longitudinal study (2008-2011). *Drug Alcohol*  
37  
38  
39  
40  
41  
42  
43 60. Koval J, Aubut J, Pederson L, et al. The Potential Effectiveness of Warning Labels on  
44 Cigarette Packages. The Perceptions of Young Adult Canadians. *Can J Public Health* 2005;  
45  
46  
47  
48  
49 61. Singh A, Owusu-Dabo E, Britton J, et al. "Pictures don't lie, seeing is believing": exploring  
50 attitudes to the introduction of pictorial warnings on cigarette packs in Ghana. *Nicotine Tob*  
51  
52  
53  
54  
55  
56  
57  
58  
59  
60



- 1  
2  
3 62. Thrasher J, Swayampakala K, Cummings M, et al. Cigarette package inserts can promote  
4 efficacy beliefs and sustained smoking cessation attempts: A longitudinal assessment of an  
5 innovative policy in Canada. *Preventive Medicine* 2016; 88:59–65.  
6  
7 doi:10.1016/j.ypmed.2016.03.006.  
8  
9  
10  
11  
12 63. Rising J, Alexander L. Marketing of menthol cigarettes and consumer perceptions. *Tob Induc*  
13 *Dis* 2011;9(1): S2. doi:10.1186/1617-9625-9-S1-S2.  
14  
15  
16  
17 64. Hammond D, Parkinson C. The impact of cigarette package design on perceptions of risk.  
18 *Journal of Public Health* 2009;31(3):345-53. doi:10.1093/pubmed/fdp066.  
19  
20  
21  
22  
23  
24  
25  
26  
27  
28  
29  
30  
31  
32  
33  
34  
35  
36  
37  
38  
39  
40  
41  
42  
43  
44  
45  
46  
47  
48  
49  
50  
51  
52  
53  
54  
55  
56  
57  
58  
59  
60

1  
2  
3 **Figure 1. Pictorial Health Warnings used in this study**  
4  
5  
6  
7  
8  
9  
10  
11  
12  
13  
14  
15  
16  
17  
18  
19  
20  
21  
22  
23  
24  
25  
26  
27  
28  
29  
30  
31  
32  
33  
34  
35  
36  
37  
38  
39  
40  
41  
42  
43  
44  
45  
46  
47  
48  
49  
50  
51  
52  
53  
54  
55  
56  
57  
58  
59  
60

For peer review only



1 2 3 4

**A. Current PHW set used in the qualitative study**

(1)Face cancer, (2) Lung cancer, (3) Mouth cancer, and (4) Throat cancer

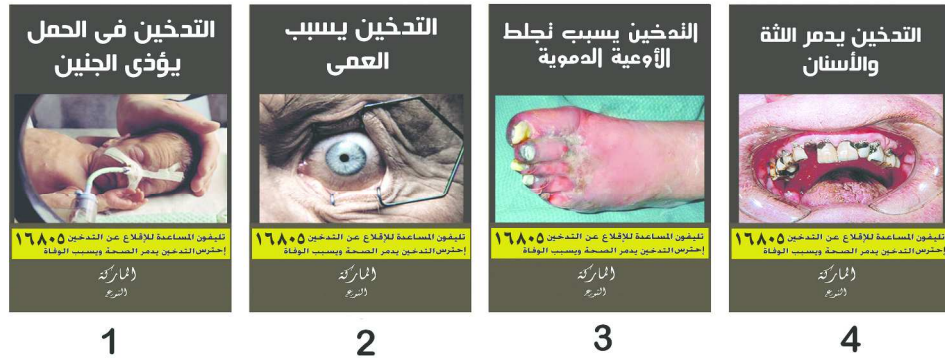

1 2 3 4

**B. Alternative PHW set used in the qualitative study**

(1)Fetal harm, (2) Blindness, (3) Blood vessel clotting, (4) Tooth and gum decay

**Figure 1. PHWs used in the study**

Figure 1. Pictorial Health Warnings used in this study

297x300mm (300 x 300 DPI)

## Supplementary

**Table 1. Total number of interviews and focus group discussions conducted by demographic profile of participants**

|       | FGDs (10, total participants=80) |     |             |     | IDIs (10) |     |             |     |
|-------|----------------------------------|-----|-------------|-----|-----------|-----|-------------|-----|
|       | Males (7)                        |     | Females (3) |     | Males (7) |     | Females (3) |     |
| Age   | S                                | NS  | S           | NS  | S         | NS  | S           | NS  |
|       | (5)                              | (2) | (2)         | (1) | (6)       | (1) | (2)         | (1) |
| 18-24 | 2                                | 1   | 1           |     | 3         | 1   | 1           |     |
| 25+   | 3                                | 1   | 1           | 1   | 3         |     | 1           | 1   |

FGDs=Focus group discussions, IDIs=In-depth interviews, S=Waterpipe smoker, NS=Non-smoker

**Table 2. Sociodemographic characteristics and waterpipe smoking status of participants**

|                                        | <b>N=90</b>        | <b>%</b>    |
|----------------------------------------|--------------------|-------------|
| <b>Gender</b>                          |                    |             |
| Male                                   | <b>65</b>          | <b>72.2</b> |
| Female                                 | <b>25</b>          | <b>27.8</b> |
| <b>Age (range 18-73)</b>               |                    |             |
| <b>Mean age ± standard deviation</b>   | <b>33.4 ± 11.6</b> |             |
| <b>Age group, years</b>                |                    |             |
| 18-24                                  | <b>21</b>          | <b>23.3</b> |
| 25+                                    | <b>69</b>          | <b>76.7</b> |
| <b>Education level</b>                 |                    |             |
| Primary or lower                       | <b>16</b>          | <b>17.7</b> |
| Secondary                              | <b>32</b>          | <b>35.6</b> |
| Tertiary                               | <b>42</b>          | <b>46.7</b> |
| <b>Occupation</b>                      |                    |             |
| Employed professional                  | <b>42</b>          | <b>46.7</b> |
| Employed non-professional              | <b>34</b>          | <b>37.8</b> |
| In further study or seeking employment | <b>14</b>          | <b>15.5</b> |
| <b>Residence</b>                       |                    |             |
| Rural                                  | <b>20</b>          | <b>22.2</b> |
| Semi-urban                             | <b>51</b>          | <b>56.7</b> |
| Urban                                  | <b>19</b>          | <b>21.2</b> |
| <b>Smoking status</b>                  |                    |             |
| Waterpipe smoker                       | <b>62</b>          | <b>68.9</b> |
| Non-smoker                             | <b>28</b>          | <b>31.1</b> |
| <b>Ever noticed PHWs on WTPs</b>       |                    |             |
| Yes                                    | <b>53</b>          | <b>58.9</b> |
| <b>Where</b>                           |                    |             |
| At cafés                               | <b>17</b>          | <b>32.1</b> |
| At home                                | <b>11</b>          | <b>20.8</b> |
| Buying tobacco                         | <b>25</b>          | <b>47.2</b> |

**Interview guide \***

| <b>Interview guide questions</b>                                                                                                                                                                                                                                                                                                                                                                                                               | <b>Parts relevant to this article</b> |
|------------------------------------------------------------------------------------------------------------------------------------------------------------------------------------------------------------------------------------------------------------------------------------------------------------------------------------------------------------------------------------------------------------------------------------------------|---------------------------------------|
| <p><b>Introductory questions</b></p> <p><i>In general, what do you think of waterpipe smoking?</i></p> <p><b>Personal experiences of waterpipe smoking</b></p> <p><i>Tell me about your waterpipe smoking, habits, duration, etc...Tell us more on how did you start smoking?</i></p> <p><i>Could you describe the setting in which you smoked waterpipe last time?</i></p>                                                                    |                                       |
| <p><b>Awareness of pictorial health warnings</b></p> <p><i>Have you ever noticed the pictorial health warnings on waterpipe tobacco packs?</i></p> <p><i>Where did you see them? Can you tell us more about the setting?</i></p> <p><i>How do they look like?</i></p>                                                                                                                                                                          | √                                     |
| <p><b>Positive and negative characteristics of the current/alternative set of PHW</b></p> <p><i>Have you ever come across the warning on this pack before? What is your first impression about it?</i></p> <p><i>What do you think/feel when you see it?</i></p> <p><i>In your opinion, what is good and is bad about it? Why do you think so?</i></p> <p><i>Do you think it is/would be effective? Why and how do you think so?</i></p>       | √                                     |
| <p><b>Reactions to placing PHW on the waterpipe device</b></p> <p><i>What is your first impression about putting the warning in this spot?</i></p> <p><i>What do you think/feel when you see there?</i></p> <p><i>In your opinion, what is good and is bad about this spot? Why do you think so?</i></p> <p><i>Do you think people will notice the PHW on this spot?</i></p> <p><i>Would it be effective? Why and how do you think so?</i></p> |                                       |

**\*This guide contains core questions. Probing questions were used when necessary (examples include questions on salience, affective reactions, perceived harm, credibility)**

**Table 3. Themes and subthemes identified from focus groups and in-depth interviews\***

| Themes                                                                            | Subthemes                                                                                                                                                                                                                                                                                             | Themes covered in this article |
|-----------------------------------------------------------------------------------|-------------------------------------------------------------------------------------------------------------------------------------------------------------------------------------------------------------------------------------------------------------------------------------------------------|--------------------------------|
| General perceptions of waterpipe smoking                                          | Factors contributing to WTS<br>Factors affecting WTS initiation and continuation<br>WTS setting<br>Patterns of WTS consumption<br>Social and cultural context of WTS<br>WTS compared to cigarette smoking<br>Tobacco product characteristics<br>Perceived health consequences<br>Reasons for quitting |                                |
| Views on pictorial health warning labels on waterpipe tobacco packs               | General knowledge /awareness of PHWs on WTPs<br>Sources of awareness<br>Most salient/recalled labels, reasons<br>Cessation helpline<br>Perception of PHWs on WTPs motivating and discouraging factors related to viewing PHW labels                                                                   | Partly                         |
| Perceptions of existing waterpipe tobacco warnings                                | General impressions, attitude (appeal, affective reactions, avoidance, wear out)<br>Positive and negative characteristics of design and content<br>Participants views of the most effective one in general<br>Possible effects on quitting and/or initiating WTS                                      | √                              |
| Insights into novel waterpipe tobacco warnings                                    | General impressions, attitude (appeal, affective reactions, avoidance)<br>Positive and negative characteristics of design and content<br>Participants views of the most effective one in general<br>Possible effects on quitting and/or initiating WTS                                                | √                              |
| Avenues for development                                                           | Participant suggestions of improved label characteristics regarding content, design, location<br>Participant suggestions for other placement locations                                                                                                                                                | Partly                         |
| Best location for inserting labels on the waterpipe device and accessories        | Views behind choosing each location<br>Concerns about each location<br>Possible effects on quitting and/or initiating WTS                                                                                                                                                                             |                                |
| Participant suggestions for reducing tobacco use in general and WTS in particular | Further strategies for improved regulations<br>Enforcing existing laws<br>Posting warnings in public and other places<br>Associate warnings with mass-media anti-tobacco campaigns, increase taxation and other suggestions                                                                           |                                |

**\* Themes presented in this article were synthesized in respect to warning content and pack design and their perceived likely effect on uptake or cessation of waterpipe smoking, comparing existing versus novel warnings.**

**Table 4. Selected participants' quotes representing views of the current and alternative pictorial health warning labels on waterpipe packs. Quotes are presented by gender, age group\*, smoking status, and region of participants**

| <i>Warning label content – perceived likely effect of existing and novel PHWs</i>                                                                                               |                                                      |
|---------------------------------------------------------------------------------------------------------------------------------------------------------------------------------|------------------------------------------------------|
| "The picture of a bent cigarette (i.e. representing sexual dysfunction) caught people's attention considerably...but the other warning...people got used to them after a while" | <i>(Male smoker, &gt;25y, rural, FGD)</i>            |
| "The most commonly known warning is that of the lungs"                                                                                                                          | <i>(Male smoker, &gt;25y, semi-urban, FGD)</i>       |
| "The picture is disgusting and frightening..."                                                                                                                                  | <i>(Male non-smoker, &lt;25y, rural, IDI)</i>        |
| "Pictures are scary and unpleasant"                                                                                                                                             | <i>(Male smoker, &gt;25y, semi-urban, FGD)</i>       |
| "The pictures make me sick..."                                                                                                                                                  | <i>(Male smoker, &gt;25y, urban, IDI)</i>            |
| "The warning shouldn't be that it causes cancer and that's it...that is just routine talk"                                                                                      | <i>(Male non-smoker, &gt;25y, urban, FGD)</i>        |
| "I just don't believe it...nobody reaches this stage"                                                                                                                           | <i>(Female smoker, &lt;25y, urban, IDI)</i>          |
| "I don't believe the warnings...I know smoking is harmful but not to that extent. This is unrealistic"                                                                          | <i>(Male smoker, &lt;25y, rural, FGD)</i>            |
| "We want to see the normal lung beside the diseased one...but this one straight is not clear"                                                                                   | <i>(Male non-smoker, &gt;25y, urban, FGD)</i>        |
| "The pictures are not realistic, we never see such things in real life"                                                                                                         | <i>(Male non-smoker, &gt;25y, semi-urban, FGD)</i>   |
| "The pictures are extremely exaggerated"                                                                                                                                        | <i>(Male smoker, &lt;25y, urban, IDI)</i>            |
| "Is this a burnt piece of pizza? (face cancer warning)...this one won't be clear to illiterates...I didn't get it before reading the text beneath"                              | <i>(Male non-smoker, &gt;25y, urban, FGD)</i>        |
| "The picture is frightening and is very disgusting"                                                                                                                             | <i>(Male smoker, &gt;25y, urban, IDI)</i>            |
| "It can make me want to look closely to see what the illness shown is"                                                                                                          | <i>(Female non-smoker, &gt;25y, semi-urban, FGD)</i> |
| "For me, the most effective one is picture of teeth affection...it's very scary and upsetting. I see that content of the warning is much more important than size"              | <i>(Male smoker, &gt;25y, semi-urban, FGD)</i>       |
| "With this shape (deformed teeth and gums) I may disturb my son when I come close to kiss him...now that will hurt me"                                                          | <i>(Male smoker, &gt;25y, semi-urban, IDI)</i>       |
| "The baby's picture may affect women more than me"                                                                                                                              | <i>(Male smoker, &gt;25y, semi-urban, IDI)</i>       |
| "If a pregnant woman saw this picture...she would fear for her unborn child to have anomalies"                                                                                  | <i>(Female smoker, &gt;25y, semi-urban, FGD)</i>     |
| "Explain the components of tobacco as glycerin and the hazards of each of them...tell them: try to smoke each component by itself and see what happens to you"                  | <i>(Male non-smoker, &gt;25y, semi-urban, FGD)</i>   |
| "Simplify the matter of quitting to people...especially those who have been smoking for a long time..."                                                                         | <i>(Male nonsmoker, &gt;25 y, rural, FGD)</i>        |
| "If you talk to a smoker about their health...they wouldn't pay attention but there are other aspects as hazards to their children"                                             | <i>(Male non-smoker, &gt;25y, semi-urban, FGD)</i>   |
| "The most effective thing that makes a smoker quit is that they themselves get ill or they see someone get ill"                                                                 | <i>(Male smoker, &gt;25y, semi-urban, IDI)</i>       |
| "I saw on the internet a pack of cigarettes with a picture of a mother and                                                                                                      | <i>(Female smoker, &lt;25 y, urban, IDI)</i>         |



|                                                                                                                                                                                                                                   |                                            |
|-----------------------------------------------------------------------------------------------------------------------------------------------------------------------------------------------------------------------------------|--------------------------------------------|
| her child, and on opening it the mother is separated from him. This a new effective idea."                                                                                                                                        |                                            |
| "A pregnant woman or a mother may ask their smoker husband to stop"                                                                                                                                                               | (Female non-smoker, >25y, semi-urban, FGD) |
| "The only thing that can force me to stop smoking, even if I'm a heavy smoker is the baby affection"                                                                                                                              | (Female smoker, <25 y, urban, IDI)         |
| "Warnings should target young people under 17 before they attempt smoking"                                                                                                                                                        | (Male non-smoker, >25y, semi-urban, FGD)   |
| "Warnings concerning sexual dysfunction can affect young smokers"                                                                                                                                                                 | (Male non-smoker, >25y, semi-urban, FGD)   |
| "Focus on the damage that the family suffers...there are problems that can occur with the wife because of smoking...so smoking may endanger the family bonds"                                                                     | (Male smoker, >25y, semi-urban, IDI)       |
| "Pictures should be more realistic, and not only focus on severe side effects like cancers... like if warnings demonstrate just a fingernail affected due to smoking not all the hand, people will be more tempted to believe it" | (Male smoker, <25 year, rural, IDI)        |
| <b>Design Features of WTPs – perceived likely effect of existing and novel PHWs</b>                                                                                                                                               |                                            |
| "The apples got my attention"                                                                                                                                                                                                     | (Female smoker, >25y, semi-urban, IDI)     |
| "After seeing this...(pointing to the fruit depicted on the pack)...it will be hard for me to link the idea with the damage in this picture"                                                                                      | (Male non-smoker, <25y, rural, FGD)        |
| "Pictures of fruits are attractive and appetizing"                                                                                                                                                                                | (Male smoker, >25y, semi-urban, FGD)       |
| "If there is no flavored tobacco, I will quit"                                                                                                                                                                                    | (Male smoker, <25y, urban, IDI)            |
| "I can't see any flavors on it...I want to hold it closely to know what did they put there instead...if shisha is served as it is...without any flavors?!...I'll quit"                                                            | (Male smoker, <25y, urban, FGD)            |
| "If flavors were banned may be some will quit but warnings have no effect"                                                                                                                                                        | (Male smoker, <25y, urban, FGD)            |
| "The pictures of fruits must be removed as they are appetizing"                                                                                                                                                                   | (Male non-smoker, <25y, rural, IDI)        |
| "The dark background makes the writings clearer"                                                                                                                                                                                  | (Male non-smoker, >25y, semi-urban, FGD)   |
| "The alternative pack is clearer regarding the color, the picture and the way of writing"                                                                                                                                         | (Male non-smoker, < 25y, rural, IDI)       |
| "The black color makes the pack a lot chic"                                                                                                                                                                                       | (Male smoker, <25y, urban, FGD )           |
| "The color of the package is dark and it conveys a sense of pessimism"                                                                                                                                                            | (Male smoker, >25y, rural, IDI)            |
| "The bigger the picture, the better"                                                                                                                                                                                              | (Male smoker, <25y, semi-urban, FGD)       |
| "The warning should be put on top because the pictures of fruits are drawing attention away from the warning"                                                                                                                     | (Female non-smoker, >25y, semi-urban, FGD) |
| "Oh! I didn't realize there was a quit line on the pack before...this dark background made some kind of contrast... the text now is way clearer for me to read"                                                                   | (Female smoker, <25y, urban, IDI)          |
| "I used to think about the hazards a lot when the pictures first appeared...then I got used to them...I don't pay them attention anymore"                                                                                         | (Male smoker, <25y, semi-urban, IDI)       |

|                                                                                                                                                                                                              |                                                       |
|--------------------------------------------------------------------------------------------------------------------------------------------------------------------------------------------------------------|-------------------------------------------------------|
| "I have seen the warnings too often that they no longer frighten me"                                                                                                                                         | <i>(Male smoker, &lt;25y, rural, FGD)</i>             |
| "The pictures are horrible but people got used to them, if a nonsmoker wished to try and saw the warnings they may change their mind but for those who are already smokers, the warnings make no difference" | <i>" (Male non-smoker, &gt;25y, semi-urban, FGD)</i>  |
| "Warnings influence the non-smokers much more than smokers, as non-smokers usually find the picture more disgusting"                                                                                         | <i>(Female, non-smoker, &gt;25y, semi-urban, FGD)</i> |
| "I avoid buying the picture of the tongue in particular (referring to the mouth cancer warning)"                                                                                                             | <i>(Male smoker, &lt;25y, semi-urban, FGD)</i>        |
| "People can go around all day looking for a certain picture (the lungs)"                                                                                                                                     | <i>(Male smoker, &gt;25y, rural, IDI)</i>             |
| "Vendors used to sell the pack with free stickers to cover the warnings"                                                                                                                                     | <i>(Male smoker, &gt;25y, semi-urban, FGD)</i>        |
| "No one would buy a pack with such warning (means warning picturing effect of smoking on children)"                                                                                                          | <i>(Female smoker, &gt;25y, semi-urban, IDI)</i>      |
| "If the warning on the pack looks bad, we tend to throw the external package away and put tobacco in another package or may be order a certain warning"                                                      | <i>(Male smoker, &gt;25y, rural, FGD)</i>             |
| "The alternative pack may make some smokers reduce smoking"                                                                                                                                                  | <i>(Male non-smoker, &lt;25y, rural, FGD)</i>         |
| "A beginner can be affected compared to a person who has been smoking for 15 years and nothing happened to them as a result of smoking"                                                                      | <i>(Male non-smoker, &lt;25y, rural, FGD)</i>         |
| "Non-smokers will be more affected by it, smokers won't be much affected"                                                                                                                                    | <i>(Female non-smoker, &gt;25y, semi-urban, IDI)</i>  |
| "It could affect those who want to start smoking, but the older smokers won't be affected much"                                                                                                              | <i>(Male smoker, &lt;25y, semi-urban, FGD)</i>        |

**\*The age group of participants was categorized as > or < 25 years, because we were interested in highlighting the views of young adults who may be at higher risk of experiencing WTS or maybe non-established WT users yet, versus older adults who might more likely have established a smoking or non-smoking behaviour.**

# Reporting checklist for qualitative study.

Based on the SRQR guidelines.

## Instructions to authors

Complete this checklist by entering the page numbers from your manuscript where readers will find each of the items listed below.

Your article may not currently address all the items on the checklist. Please modify your text to include the missing information. If you are certain that an item does not apply, please write "n/a" and provide a short explanation.

Upload your completed checklist as an extra file when you submit to a journal.

In your methods section, say that you used the SRQR reporting guidelines, and cite them as:

O'Brien BC, Harris IB, Beckman TJ, Reed DA, Cook DA. Standards for reporting qualitative research: a synthesis of recommendations. *Acad Med.* 2014;89(9):1245-1251.

|                              | Reporting Item                                                                                                                                                                                                                                          | Page Number |
|------------------------------|---------------------------------------------------------------------------------------------------------------------------------------------------------------------------------------------------------------------------------------------------------|-------------|
|                              | <a href="#">#1</a> Concise description of the nature and topic of the study identifying the study as qualitative or indicating the approach (e.g. ethnography, grounded theory) or data collection methods (e.g. interview, focus group) is recommended | 1,3, 8 & 9  |
|                              | <a href="#">#2</a> Summary of the key elements of the study using the abstract format of the intended publication; typically includes background, purpose, methods, results and conclusions                                                             | 3, 4        |
| Problem formulation          | <a href="#">#3</a> Description and significance of the problem / phenomenon studied: review of relevant theory and empirical work; problem statement                                                                                                    | 3, 5-9      |
| Purpose or research question | <a href="#">#4</a> Purpose of the study and specific objectives or questions                                                                                                                                                                            | 3, 8        |
| Qualitative approach         | <a href="#">#5</a> Qualitative approach (e.g. ethnography,                                                                                                                                                                                              | 8, 9        |

|                                                                                                                                                                           |                                                                                                                                                                                                                                                                                                                                                                                                                                                                                                                                                                                                                                                             |                                                                                                                                                                                                    |
|---------------------------------------------------------------------------------------------------------------------------------------------------------------------------|-------------------------------------------------------------------------------------------------------------------------------------------------------------------------------------------------------------------------------------------------------------------------------------------------------------------------------------------------------------------------------------------------------------------------------------------------------------------------------------------------------------------------------------------------------------------------------------------------------------------------------------------------------------|----------------------------------------------------------------------------------------------------------------------------------------------------------------------------------------------------|
| <p>1 and research<br/>2 paradigm<br/>3<br/>4<br/>5<br/>6<br/>7<br/>8<br/>9<br/>10<br/>11<br/>12<br/>13<br/>14<br/>15<br/>16<br/>17<br/>18<br/>19<br/>20<br/>21<br/>22</p> | <p>grounded theory, case study,<br/>phenomenology, narrative research) and<br/>guiding theory if appropriate; identifying the<br/>research paradigm (e.g. postpositivist,<br/>constructivist / interpretivist) is also<br/>recommended; rationale. The rationale<br/>should briefly discuss the justification for<br/>choosing that theory, approach, method or<br/>technique rather than other options<br/>available; the assumptions and limitations<br/>implicit in those choices and how those<br/>choices influence study conclusions and<br/>transferability. As appropriate the rationale<br/>for several items might be discussed<br/>together.</p> | <p>See 5 and Supplementary<br/>file page 8 for more on<br/>limitations</p>                                                                                                                         |
| <p>23 Researcher<br/>24 characteristics and<br/>25 reflexivity<br/>26<br/>27<br/>28<br/>29<br/>30<br/>31<br/>32<br/>33<br/>34<br/>35<br/>36<br/>37</p>                    | <p><a href="#">#6</a> Researchers' characteristics that may<br/>influence the research, including personal<br/>attributes, qualifications / experience,<br/>relationship with participants, assumptions<br/>and / or presuppositions; potential or actual<br/>interaction between researchers'<br/>characteristics and the research questions,<br/>approach, methods, results and / or<br/>transferability</p>                                                                                                                                                                                                                                              | <p>11, 12 for reflexivity<br/><br/>Researchers are trained<br/>or experienced in<br/>qualitative methods. Word<br/>count limited detailing<br/>qualifications and other<br/>items listed here.</p> |
| <p>38 Context<br/>39<br/>40</p>                                                                                                                                           | <p><a href="#">#7</a> Setting / site and salient contextual factors;<br/>rationale</p>                                                                                                                                                                                                                                                                                                                                                                                                                                                                                                                                                                      | <p>8, 9, 11</p>                                                                                                                                                                                    |
| <p>41 Sampling strategy<br/>42<br/>43<br/>44<br/>45<br/>46<br/>47<br/>48<br/>49</p>                                                                                       | <p><a href="#">#8</a> How and why research participants,<br/>documents, or events were selected;<br/>criteria for deciding when no further<br/>sampling was necessary (e.g. sampling<br/>saturation); rationale</p>                                                                                                                                                                                                                                                                                                                                                                                                                                         | <p>9, 10, 12</p>                                                                                                                                                                                   |
| <p>50 Ethical issues<br/>51 pertaining to human<br/>52 subjects<br/>53<br/>54<br/>55<br/>56<br/>57</p>                                                                    | <p><a href="#">#9</a> Documentation of approval by an<br/>appropriate ethics review board and<br/>participant consent, or explanation for lack<br/>thereof; other confidentiality and data<br/>security issues</p>                                                                                                                                                                                                                                                                                                                                                                                                                                          | <p>9, 11</p>                                                                                                                                                                                       |
| <p>58 Data collection<br/>59<br/>60</p>                                                                                                                                   | <p><a href="#">#10</a> Types of data collected; details of data</p>                                                                                                                                                                                                                                                                                                                                                                                                                                                                                                                                                                                         | <p>10, 11</p>                                                                                                                                                                                      |

|    |                    |                     |                                               |                  |
|----|--------------------|---------------------|-----------------------------------------------|------------------|
| 1  | methods            |                     | collection procedures including (as           |                  |
| 2  |                    |                     | appropriate) start and stop dates of data     |                  |
| 3  |                    |                     | collection and analysis, iterative process,   |                  |
| 4  |                    |                     | triangulation of sources / methods, and       |                  |
| 5  |                    |                     | modification of procedures in response to     |                  |
| 6  |                    |                     | evolving study findings; rationale            |                  |
| 7  |                    |                     |                                               |                  |
| 8  |                    |                     |                                               |                  |
| 9  |                    |                     |                                               |                  |
| 10 | Data collection    | <a href="#">#11</a> | Description of instruments (e.g. interview    | 10, 11           |
| 11 | instruments and    |                     | guides, questionnaires) and devices (e.g.     |                  |
| 12 | technologies       |                     | audio recorders) used for data collection; if |                  |
| 13 |                    |                     | / how the instruments(s) changed over the     |                  |
| 14 |                    |                     | course of the study                           |                  |
| 15 |                    |                     |                                               |                  |
| 16 |                    |                     |                                               |                  |
| 17 |                    |                     |                                               |                  |
| 18 | Units of study     | <a href="#">#12</a> | Number and relevant characteristics of        | 9, 10            |
| 19 |                    |                     | participants, documents, or events            |                  |
| 20 |                    |                     | included in the study; level of participation |                  |
| 21 |                    |                     | (could be reported in results)                |                  |
| 22 |                    |                     |                                               |                  |
| 23 |                    |                     |                                               |                  |
| 24 |                    |                     |                                               |                  |
| 25 | Data processing    | <a href="#">#13</a> | Methods for processing data prior to and      | 11               |
| 26 |                    |                     | during analysis, including transcription,     |                  |
| 27 |                    |                     | data entry, data management and security,     |                  |
| 28 |                    |                     | verification of data integrity, data coding,  |                  |
| 29 |                    |                     | and anonymisation / deidentification of       |                  |
| 30 |                    |                     | excerpts                                      |                  |
| 31 |                    |                     |                                               |                  |
| 32 |                    |                     |                                               |                  |
| 33 |                    |                     |                                               |                  |
| 34 |                    |                     |                                               |                  |
| 35 | Data analysis      | <a href="#">#14</a> | Process by which inferences, themes, etc.     | 11, 12           |
| 36 |                    |                     | were identified and developed, including      |                  |
| 37 |                    |                     | the researchers involved in data analysis;    |                  |
| 38 |                    |                     | usually references a specific paradigm or     |                  |
| 39 |                    |                     | approach; rationale                           |                  |
| 40 |                    |                     |                                               |                  |
| 41 |                    |                     |                                               |                  |
| 42 |                    |                     |                                               |                  |
| 43 | Techniques to      | <a href="#">#15</a> | Techniques to enhance trustworthiness         | 12               |
| 44 | enhance            |                     | and credibility of data analysis (e.g.        |                  |
| 45 | trustworthiness    |                     | member checking, audit trail, triangulation); |                  |
| 46 |                    |                     | rationale                                     |                  |
| 47 |                    |                     |                                               |                  |
| 48 |                    |                     |                                               |                  |
| 49 |                    |                     |                                               |                  |
| 50 | Syntheses and      | <a href="#">#16</a> | Main findings (e.g. interpretations,          | 12               |
| 51 | interpretation     |                     | inferences, and themes); might include        |                  |
| 52 |                    |                     | development of a theory or model, or          | See 9 for theory |
| 53 |                    |                     | integration with prior research or theory     |                  |
| 54 |                    |                     |                                               |                  |
| 55 |                    |                     |                                               |                  |
| 56 |                    |                     |                                               |                  |
| 57 | Links to empirical | <a href="#">#17</a> | Evidence (e.g. quotes, field notes, text      | 13-17            |
| 58 | data               |                     | excerpts, photographs) to substantiate        |                  |
| 59 |                    |                     |                                               |                  |
| 60 |                    |                     |                                               |                  |

|    |                         |                                                                 |                           |
|----|-------------------------|-----------------------------------------------------------------|---------------------------|
| 1  |                         | analytic findings                                               |                           |
| 2  |                         |                                                                 |                           |
| 3  | Intergration with prior | <a href="#">#18</a> Short summary of main findings;             | 18-21                     |
| 4  | work, implications,     | explanation of how findings and                                 |                           |
| 5  | transferability and     | conclusions connect to, support, elaborate                      | See also 3, 5 and         |
| 6  | contribution(s) to the  | on, or challenge conclusions of earlier                         | Supplementary file page 8 |
| 7  | field                   | scholarship; discussion of scope of                             | for more on limitations   |
| 8  |                         | application / generalizability; identification                  |                           |
| 9  |                         | of unique contributions(s) to scholarship in                    |                           |
| 10 |                         | a discipline or field                                           |                           |
| 11 |                         |                                                                 |                           |
| 12 |                         |                                                                 |                           |
| 13 |                         |                                                                 |                           |
| 14 |                         |                                                                 |                           |
| 15 | Limitations             | <a href="#">#19</a> Trustworthiness and limitations of findings | 5 and Supplementary file  |
| 16 |                         |                                                                 | page 8 for more on        |
| 17 |                         |                                                                 | limitations               |
| 18 |                         |                                                                 |                           |
| 19 |                         |                                                                 |                           |
| 20 | Conflicts of interest   | <a href="#">#20</a> Potential sources of influence of perceived | 22                        |
| 21 |                         | influence on study conduct and                                  |                           |
| 22 |                         | conclusions; how these were managed                             |                           |
| 23 |                         |                                                                 |                           |
| 24 |                         |                                                                 |                           |
| 25 |                         |                                                                 |                           |
| 26 | Funding                 | <a href="#">#21</a> Sources of funding and other support; role  | 22                        |
| 27 |                         | of funders in data collection, interpretation                   |                           |
| 28 |                         | and reporting                                                   |                           |
| 29 |                         |                                                                 |                           |
| 30 |                         |                                                                 |                           |

31 The SRQR checklist is distributed with permission of Wolters Kluwer © 2014 by the Association of  
 32 American Medical Colleges. This checklist can be completed online using  
 33 <https://www.goodreports.org/>, a tool made by the [EQUATOR Network](#) in collaboration with  
 34 [Penelope.ai](#)  
 35  
 36  
 37  
 38  
 39  
 40  
 41  
 42  
 43  
 44  
 45  
 46  
 47  
 48  
 49  
 50  
 51  
 52  
 53  
 54  
 55  
 56  
 57  
 58  
 59  
 60
